# Supplementary material for: KOREF_S1: phased, parental trio-binned Korean reference genome using long reads and Hi-C sequencing methods
Source: PubMed Central journal article supplement (PMC8952264; doi:10.1093/gigascience/giac022), 2022-03-24

## KOREF\_S1: the phased, parental Trio-binned Korean reference genome using long-reads and Hi-C sequencing methods --Manuscript Draft--

|                                                      |                                                                                                                                                                                                                                                                                                                                                                                                                                                                                                                                                                                                                                                                                                                                                                                                                                                                                                                                                                                                                                                                                                                                                                                                                                                                                                                                                                                                                                                                                                                                                                                                                                                                                                        |                   |
|------------------------------------------------------|--------------------------------------------------------------------------------------------------------------------------------------------------------------------------------------------------------------------------------------------------------------------------------------------------------------------------------------------------------------------------------------------------------------------------------------------------------------------------------------------------------------------------------------------------------------------------------------------------------------------------------------------------------------------------------------------------------------------------------------------------------------------------------------------------------------------------------------------------------------------------------------------------------------------------------------------------------------------------------------------------------------------------------------------------------------------------------------------------------------------------------------------------------------------------------------------------------------------------------------------------------------------------------------------------------------------------------------------------------------------------------------------------------------------------------------------------------------------------------------------------------------------------------------------------------------------------------------------------------------------------------------------------------------------------------------------------------|-------------------|
| <b>Manuscript Number:</b>                            | GIGA-D-21-00219R1                                                                                                                                                                                                                                                                                                                                                                                                                                                                                                                                                                                                                                                                                                                                                                                                                                                                                                                                                                                                                                                                                                                                                                                                                                                                                                                                                                                                                                                                                                                                                                                                                                                                                      |                   |
| <b>Full Title:</b>                                   | KOREF_S1: the phased, parental Trio-binned Korean reference genome using long-reads and Hi-C sequencing methods                                                                                                                                                                                                                                                                                                                                                                                                                                                                                                                                                                                                                                                                                                                                                                                                                                                                                                                                                                                                                                                                                                                                                                                                                                                                                                                                                                                                                                                                                                                                                                                        |                   |
| <b>Article Type:</b>                                 | Data Note                                                                                                                                                                                                                                                                                                                                                                                                                                                                                                                                                                                                                                                                                                                                                                                                                                                                                                                                                                                                                                                                                                                                                                                                                                                                                                                                                                                                                                                                                                                                                                                                                                                                                              |                   |
| <b>Funding Information:</b>                          | ministry of smes and startups (P0016193)                                                                                                                                                                                                                                                                                                                                                                                                                                                                                                                                                                                                                                                                                                                                                                                                                                                                                                                                                                                                                                                                                                                                                                                                                                                                                                                                                                                                                                                                                                                                                                                                                                                               | Dr. Jong Hwa Bhak |
| <b>Abstract:</b>                                     | <p><b>Background</b></p> <p>KOREF is the Korean reference genome which was constructed with various sequencing technologies including long reads, short reads, and optical mapping methods. It is also the first East Asian multiomic reference genome accompanied by extensive clinical information, time series and multiomic data, and his parental sequencing data. However, it was still not a chromosome-scale reference. Here, we updated the previous KOREF assembly to a new chromosome-level haploid assembly of KOREF, KOREF_S1v2.1. ONT PromethION, PacBio Hifi-CCS, and Hi-C technology were used to build the most accurate East Asian reference assembled so far.</p> <p><b>Results</b></p> <p>We produced 705 Gb ONT reads and 114 Gb PacBio HiFi reads, and corrected ONT reads by PacBio reads. The corrected ultra-long reads reached higher accuracy of 1.4% base-errors than the previous KOREF_S1v1.0, which was mainly built with short reads. KOREF has parental genome information, and we successfully phased it using a trio-binning method acquiring a near-complete haploid-assembly. The final assembly resulted in total length of 2.9 Gb with an N50 of 150 Mb, and the longest scaffold covered 97.3% of GRCh38's chromosome 2. And the final assembly showed high base accuracy, less than 0.01% of base-errors.</p> <p><b>Conclusions</b></p> <p>KOREF_S1v2.1 is the first chromosome-scale haploid assembly of the Korean reference genome with high contiguity and accuracy. Our study provides useful resources of the Korean reference genome and demonstrates a new strategy of hybrid assembly which collaborates ONT's PromethION and PacBio's HiFi-CCS.</p> |                   |
| <b>Corresponding Author:</b>                         | Jong Hwa Bhak, Ph.D.<br>UNIST<br>Ulsan, Ulsan KOREA, REPUBLIC OF                                                                                                                                                                                                                                                                                                                                                                                                                                                                                                                                                                                                                                                                                                                                                                                                                                                                                                                                                                                                                                                                                                                                                                                                                                                                                                                                                                                                                                                                                                                                                                                                                                       |                   |
| <b>Corresponding Author Secondary Information:</b>   |                                                                                                                                                                                                                                                                                                                                                                                                                                                                                                                                                                                                                                                                                                                                                                                                                                                                                                                                                                                                                                                                                                                                                                                                                                                                                                                                                                                                                                                                                                                                                                                                                                                                                                        |                   |
| <b>Corresponding Author's Institution:</b>           | UNIST                                                                                                                                                                                                                                                                                                                                                                                                                                                                                                                                                                                                                                                                                                                                                                                                                                                                                                                                                                                                                                                                                                                                                                                                                                                                                                                                                                                                                                                                                                                                                                                                                                                                                                  |                   |
| <b>Corresponding Author's Secondary Institution:</b> |                                                                                                                                                                                                                                                                                                                                                                                                                                                                                                                                                                                                                                                                                                                                                                                                                                                                                                                                                                                                                                                                                                                                                                                                                                                                                                                                                                                                                                                                                                                                                                                                                                                                                                        |                   |
| <b>First Author:</b>                                 | Hui-su Kim, Ph.D.                                                                                                                                                                                                                                                                                                                                                                                                                                                                                                                                                                                                                                                                                                                                                                                                                                                                                                                                                                                                                                                                                                                                                                                                                                                                                                                                                                                                                                                                                                                                                                                                                                                                                      |                   |
| <b>First Author Secondary Information:</b>           |                                                                                                                                                                                                                                                                                                                                                                                                                                                                                                                                                                                                                                                                                                                                                                                                                                                                                                                                                                                                                                                                                                                                                                                                                                                                                                                                                                                                                                                                                                                                                                                                                                                                                                        |                   |
| <b>Order of Authors:</b>                             | Hui-su Kim, Ph.D.<br>Sungwon Jeon, Ph.D.<br>Yeonkyung Kim<br>Changjae Kim, Ph.D.                                                                                                                                                                                                                                                                                                                                                                                                                                                                                                                                                                                                                                                                                                                                                                                                                                                                                                                                                                                                                                                                                                                                                                                                                                                                                                                                                                                                                                                                                                                                                                                                                       |                   |

|                                                |                                                                                                                                                                                                                                                                                                                                                                                                                                                                                                                                                                                                                                                                                                                                                                                                                                                                                                                                                                                                                                                                                                                                                                                                                                                                                                                                                                                                                                                                                                                                                                                                                                                                                                                                                                                                                                                                                                                                                                                                                                                                                                                                                                                                                                                                                                                                                                                                                                                                                                                                                                                                                                                                                                                                                                                                                                                                                                                                                                                                                                                                                                                                                                                                                                                                                                                                                                                        |
|------------------------------------------------|----------------------------------------------------------------------------------------------------------------------------------------------------------------------------------------------------------------------------------------------------------------------------------------------------------------------------------------------------------------------------------------------------------------------------------------------------------------------------------------------------------------------------------------------------------------------------------------------------------------------------------------------------------------------------------------------------------------------------------------------------------------------------------------------------------------------------------------------------------------------------------------------------------------------------------------------------------------------------------------------------------------------------------------------------------------------------------------------------------------------------------------------------------------------------------------------------------------------------------------------------------------------------------------------------------------------------------------------------------------------------------------------------------------------------------------------------------------------------------------------------------------------------------------------------------------------------------------------------------------------------------------------------------------------------------------------------------------------------------------------------------------------------------------------------------------------------------------------------------------------------------------------------------------------------------------------------------------------------------------------------------------------------------------------------------------------------------------------------------------------------------------------------------------------------------------------------------------------------------------------------------------------------------------------------------------------------------------------------------------------------------------------------------------------------------------------------------------------------------------------------------------------------------------------------------------------------------------------------------------------------------------------------------------------------------------------------------------------------------------------------------------------------------------------------------------------------------------------------------------------------------------------------------------------------------------------------------------------------------------------------------------------------------------------------------------------------------------------------------------------------------------------------------------------------------------------------------------------------------------------------------------------------------------------------------------------------------------------------------------------------------------|
|                                                | Jihun Bhak                                                                                                                                                                                                                                                                                                                                                                                                                                                                                                                                                                                                                                                                                                                                                                                                                                                                                                                                                                                                                                                                                                                                                                                                                                                                                                                                                                                                                                                                                                                                                                                                                                                                                                                                                                                                                                                                                                                                                                                                                                                                                                                                                                                                                                                                                                                                                                                                                                                                                                                                                                                                                                                                                                                                                                                                                                                                                                                                                                                                                                                                                                                                                                                                                                                                                                                                                                             |
|                                                | Jong Hwa Bhak, Ph.D.                                                                                                                                                                                                                                                                                                                                                                                                                                                                                                                                                                                                                                                                                                                                                                                                                                                                                                                                                                                                                                                                                                                                                                                                                                                                                                                                                                                                                                                                                                                                                                                                                                                                                                                                                                                                                                                                                                                                                                                                                                                                                                                                                                                                                                                                                                                                                                                                                                                                                                                                                                                                                                                                                                                                                                                                                                                                                                                                                                                                                                                                                                                                                                                                                                                                                                                                                                   |
| <b>Order of Authors Secondary Information:</b> |                                                                                                                                                                                                                                                                                                                                                                                                                                                                                                                                                                                                                                                                                                                                                                                                                                                                                                                                                                                                                                                                                                                                                                                                                                                                                                                                                                                                                                                                                                                                                                                                                                                                                                                                                                                                                                                                                                                                                                                                                                                                                                                                                                                                                                                                                                                                                                                                                                                                                                                                                                                                                                                                                                                                                                                                                                                                                                                                                                                                                                                                                                                                                                                                                                                                                                                                                                                        |
| <b>Response to Reviewers:</b>                  | <p>Revision for KOREF manuscript to the GigaScience</p> <p>Reviewer #1:<br/> The authors present an improved reference assembly for an extensively characterized Korean son in a trio. Specifically, they partition ONT and HiFi reads by haplotype, correct ONT reads with HiFi reads, and assemble the corrected reads followed by scaffolding with Hi-C. This is an assembly approach I haven't seen before, and it yields impressive chromosome-scale scaffolds. However, the completeness, contig N50's, and QV's are substantially worse than recent assemblies from HiFi data alone, particularly from trio-hifiasm,</p> <p>We noted and emphasized the limitation of our assembly.</p> <p>so I think the authors need to better emphasize the limitations of their assembly, as well as its strengths. If this is made clear, I expect this to be a useful manuscript.</p> <p>1. The authors should clearly state in the results that their QV of ~44 is substantially lower than the QV of ~50 for recently published hifiasm assemblies that use HiFi data alone, albeit HiFi with longer read lengths (<a href="https://www.nature.com/articles/s41592-020-01056-5/tables/3">https://www.nature.com/articles/s41592-020-01056-5/tables/3</a>)</p> <p>Thank you. It is true that our QV was substantially lower than the QV of Hifiasm assemblies. We have now additionally compared contig assemblies of KOREF, HG00733, and HG002. All results are in Table 5. HG002 assembly showed highest QV of 51.6 and PromethION assembly of KOREF showed lowest QV of 33.8. HiFi-PromethION hybrid assembly of KOREF scored higher QV (42.2) against PromethION assembly. However, it was lower than the HiFi assembly of KOREF (QV 45.1). We noted this on Line 303.</p> <p>2. The authors should clearly state in the main text that their assembly's completeness in Table S3 is only 90-92%, &gt;10x more missing sequence than their hifiasm assembly (99.2-99.7%)</p> <p>We agree. The hifiasm assemblies showed 8~9% higher than HiFi-PromethION hybrid assembly on haploid completeness. We stated this on the discussion section, line 325.</p> <p>3. Could the authors use their dipcall analysis to better understand what is missing from the assembly (e.g., segmental duplications)?</p> <p>To identify missing regions, we made an alignment of our assembly against CHM13 v1.1 using Mummer and Dot. From an alignment against CHM13, we found long missing sequences on centromeric regions and they could be found on Fig. S1 (chr. 1) and S2 (chr. X).</p> <p>4. I suspect the assembly may collapse many segmental duplications, causing base-level and structural errors in the assembly, which could cause many problems when using the reference, so the authors should make this clear. For example, how many of the missing genes are in segmental duplications?</p> <p>From an alignment against CHM13, we found long missing sequences on centromeric regions and they could be found on Fig. S1 (chr. 1) and S2 (chr. X). On chromosome one, about 29 Mb was missing and they were located on a centromeric region. On chromosome X, missing sequences of a centromeric region had a length of about 4 Mb (Fig. S2). We stated this on Line 242.</p> <p>5. What version of hifiasm was used by the authors?</p> <p>We used v0.15.5-r352 (Line 225).</p> |

6. This statement is mis-leading, since the CHM13 reference is much more complete and contiguous, even though KOREF has a comparable scaffold length: "The results showed that KOREF\_S1v2.1 is more contiguous than AK1 and HuRef, and comparable to JG2.0.0 Beta and CHM13\_v1.1 (Table 2). Among six genome assemblies, KOREF\_S1v2.1 and CHM13 were a haplotype-resolved assembly with a chromosome-scale". It should be revised to something like "The results showed that KOREF\_S1v2.1 has longer scaffold N50 than AK1 and HuRef, and scaffold N50 comparable to JG2.0.0 Beta and CHM13\_v1.1 (Table 2). Among these six genome assemblies, KOREF\_S1v2.1 and CHM13 were the only haplotype-resolved assemblies with a chromosome-scale, though KOREF\_S1v2.1 has lower QV, shorter contigs, and is missing 8-10% of the human genome sequence included in CHM13\_v1.1. KOREF\_S1v2.1 also has longer scaffolds than recent trio-hifiasm-based assemblies, but has shorter contig N50, lower QV, and substantially lower completeness."

We agree with your comments and revised the texts according to your suggestion.

7. Could the authors please elaborate on this conclusion "From a pilot study, an error-correction module of the 3D-DNA pipeline seemed to split long repetitive regions complicatedly, and it made difficult to construct scaffolds or curate misassemblies (Fig. S1)"? No Fig S1 was included in the submission, and this merits more discussion and detailed methods if the authors want to claim this.

You are right. We missed to include Fig. S1 and prepared it as Fig. S3-A and -B. We constructed scaffolds using contigs from KOREF's paternal hifiasm assembly and Hi-C sequencing data by 3D-DNA pipeline. Fig. S3-A shows a Hi-C heat map of contigs without correcting misassemblies and Fig. S3-B shows a Hi-C heat map of contigs/scaffolds with correcting misassemblies. On Fig. S3-A, we can find white stripe patterns from long repetitive regions, such as centromeres or telomeres, in contigs or on the border of contigs. However, on Fig. S3-B, a small number of white stripes were found in scaffolds. And we found a large amount of short contigs with long repetitive sequences that have appeared to come from centromeres or telomeres. Its length reaches 160 Mb. The developers of 3D-DNA pipeline already have warned this on their github page. To avoid this problem, we needed to build a new strategy that enabled to correct local misassemblies on long repetitive regions by Hi-C sequencing. We noted this on Line 286.

8. The authors should state in the main text that the N50 read lengths from ONT and HiFi, since they are relatively small compared to current best practice.

Good point. We added N50 read lengths and the longest read lengths from ONT and HiFi in the results section (Line 180). An N50 of PromethION sequencing ranged from 6,793 bp to 18,109 bp and an N50 of PacBio HiFi ranged from 11,846 bp to 15,901. About lengths of the longest read, PromethION ranged from 160,294 bp to 1,753,381 bp and PacBio HiFi ranged from 28,947 bp to 36,401 bp.

9. It would be useful to compare to other recent reference genomes and assemblies, such as <https://genomebiology.biomedcentral.com/articles/10.1186/s13059-020-02047-7>, <https://doi.org/10.1101/2021.06.10.447952>, and <https://www.nature.com/articles/s41592-020-01056-5>

Thank you for recommending additional human genome assemblies. We have now added some comparison statistics of Ash1 assembly and PR1 assembly to table 2 (Line 231). The results showed that KOREF\_S1v2.1 has longer scaffold N50 than AK1, HuRef, Ash1 and PR1, and scaffold N50 was comparable to JG2.0.0 Beta and CHM13\_v1.1.

Reviewer #2:

This paper reported the construction of KOREF\_S1v2, a reference genome for Korean or Eastern Asian, using long read sequencing platforms in addition to NGS sequencing and HiC sequencing platforms. A reference genome construction method was introduced to combine parent genomes to increase the quality of the final assembled genome. The constructed genome was assessed for its quality by comparing it to the existing KOREF genome and the human reference genome. The goal of this paper is to provide an accurate Korean reference genome. A few issues are listed below.

|                                                                                                                                                                                                                                                                                                                                                                                                                                    |                                                                                                                                                                                                                                                                                                                                                                                                                                                                                                                                                                                                                                                                                                                                                                                                                                                                                                                                                                                                                                                                                                                                                                                |
|------------------------------------------------------------------------------------------------------------------------------------------------------------------------------------------------------------------------------------------------------------------------------------------------------------------------------------------------------------------------------------------------------------------------------------|--------------------------------------------------------------------------------------------------------------------------------------------------------------------------------------------------------------------------------------------------------------------------------------------------------------------------------------------------------------------------------------------------------------------------------------------------------------------------------------------------------------------------------------------------------------------------------------------------------------------------------------------------------------------------------------------------------------------------------------------------------------------------------------------------------------------------------------------------------------------------------------------------------------------------------------------------------------------------------------------------------------------------------------------------------------------------------------------------------------------------------------------------------------------------------|
|                                                                                                                                                                                                                                                                                                                                                                                                                                    | <p>Major issues</p> <p>1. Line 52, "GRCh38 ... derives from a single individual, mostly based on Caucasian and African ancestry", the content was incorrect, and the sentence needs a revision.</p> <p>You are right. GRCh38 was constructed from thirteen anonymous volunteers. We corrected the Line 52 from "a single individual" to "thirteen anonymous volunteers". Thank you.</p> <p>2. Line 200, "the genes included 20,378 protein-coding genes with 166,570 transcripts, 46,973 lncRNAs and 17,535 pseudogenes.", the number of protein coding transcripts, 166,570, was much bigger than the number for protein-coding transcripts listed in GENCODE, which is about 87K. Please double check the numbers.</p> <p>We agree with you. We found a mistake on the leftover and have fixed it. Now, we have 19,668 protein coding genes with 85,889 transcripts (Line 217). And we also added a table for assessment of the protein coding genes using BUSCO (Table 4). Thank you.</p> <p>Minor issues</p> <p>1. Line 234, "and it made difficult to construct" --&gt;" and made it difficult to construct".</p> <p>Thank you. We fixed the text as your suggestion.</p> |
| <b>Additional Information:</b>                                                                                                                                                                                                                                                                                                                                                                                                     |                                                                                                                                                                                                                                                                                                                                                                                                                                                                                                                                                                                                                                                                                                                                                                                                                                                                                                                                                                                                                                                                                                                                                                                |
| <b>Question</b>                                                                                                                                                                                                                                                                                                                                                                                                                    | <b>Response</b>                                                                                                                                                                                                                                                                                                                                                                                                                                                                                                                                                                                                                                                                                                                                                                                                                                                                                                                                                                                                                                                                                                                                                                |
| Are you submitting this manuscript to a special series or article collection?                                                                                                                                                                                                                                                                                                                                                      | No                                                                                                                                                                                                                                                                                                                                                                                                                                                                                                                                                                                                                                                                                                                                                                                                                                                                                                                                                                                                                                                                                                                                                                             |
| <p><b>Experimental design and statistics</b></p> <p>Full details of the experimental design and statistical methods used should be given in the Methods section, as detailed in our <a href="#">Minimum Standards Reporting Checklist</a>. Information essential to interpreting the data presented should be made available in the figure legends.</p> <p>Have you included all the information requested in your manuscript?</p> | Yes                                                                                                                                                                                                                                                                                                                                                                                                                                                                                                                                                                                                                                                                                                                                                                                                                                                                                                                                                                                                                                                                                                                                                                            |
| <p><b>Resources</b></p> <p>A description of all resources used, including antibodies, cell lines, animals and software tools, with enough information to allow them to be uniquely identified, should be included in the Methods section. Authors are strongly encouraged to cite <a href="#">Research Resource Identifiers</a> (RRIDs) for antibodies, model organisms and tools, where possible.</p>                             | Yes                                                                                                                                                                                                                                                                                                                                                                                                                                                                                                                                                                                                                                                                                                                                                                                                                                                                                                                                                                                                                                                                                                                                                                            |

|                                                                                                                                                                                                                                                                                                                                                                                                                                                                                                                                                         |            |
|---------------------------------------------------------------------------------------------------------------------------------------------------------------------------------------------------------------------------------------------------------------------------------------------------------------------------------------------------------------------------------------------------------------------------------------------------------------------------------------------------------------------------------------------------------|------------|
| <p>Have you included the information requested as detailed in our <a href="#">Minimum Standards Reporting Checklist</a>?</p>                                                                                                                                                                                                                                                                                                                                                                                                                            |            |
| <p><b>Availability of data and materials</b></p> <p>All datasets and code on which the conclusions of the paper rely must be either included in your submission or deposited in <a href="#">publicly available repositories</a> (where available and ethically appropriate), referencing such data using a unique identifier in the references and in the “Availability of Data and Materials” section of your manuscript.</p> <p>Have you have met the above requirement as detailed in our <a href="#">Minimum Standards Reporting Checklist</a>?</p> | <p>Yes</p> |

1 **KOREF\_S1: the phased, parental Trio-binned Korean**  
2 **reference genome using long-reads and Hi-C sequencing**  
3 **methods**

4  
5 Hui-su Kim<sup>1</sup>, Sungwon Jeon<sup>1,2,3</sup>, Yeonkyung Kim<sup>1</sup>, Changjae Kim<sup>2</sup>, Jihun Bhak<sup>1,2</sup>, and Jong  
6 Bhak<sup>1,2,3,4\*</sup>

7 <sup>1</sup> Korean Genomics Center (KOGIC), Ulsan National Institute of Science and Technology  
8 (UNIST), Ulsan, 44919, Republic of Korea

9 <sup>2</sup> Department of Biomedical Engineering, College of Information and Biotechnology, Ulsan  
10 National Institute of Science and Technology (UNIST), Ulsan, 44919, Republic of Korea

11 <sup>3</sup> Clinomics LTD, Ulsan, 44919, Republic of Korea

12 <sup>4</sup> Personal Genomics Institute, Genome Research Foundation, Cheongju, 28160, Republic of  
13 Korea

14

15 \*Correspondence author:

16

17 Name: Jong Bhak, Ph.D.

18 Address: #110-303, Ulsan National Institute of Science and Technology, UNIST-gil 50, Eonyang-  
19 eup, Ulju-gu, Ulsan 44919, Republic of Korea

20 Phone: (+82) 10-4644-6754

21 Email: [jongbhak@genomics.org](mailto:jongbhak@genomics.org), ORCID: 0000-0002-4228-1299

## 22 **Abstract**

## 23 **Background**

24 KOREF is the Korean reference genome which was constructed with various sequencing  
25 technologies including long reads, short reads, and optical mapping methods. It is also the first  
26 East Asian multiomic reference genome accompanied by extensive clinical information, time  
27 series and multiomic data, and his parental sequencing data. However, it was still not a  
28 chromosome-scale reference. Here, we updated the previous KOREF assembly to a new  
29 chromosome-level haploid assembly of KOREF, KOREF\_S1v2.1. ONT PromethION, PacBio  
30 HiFi-CCS, and Hi-C technology were used to build the most accurate East Asian reference  
31 assembled so far.

## 32 **Results**

33 We produced 705 Gb ONT reads and 114 Gb PacBio HiFi reads, and corrected ONT reads by  
34 PacBio reads. The corrected ultra-long reads reached higher accuracy of 1.4% base-errors than the  
35 previous KOREF\_S1v1.0, which was mainly built with short reads. KOREF has parental genome  
36 information, and we successfully phased it using a trio-binning method acquiring a near-complete  
37 haploid-assembly. The final assembly resulted in total length of 2.9 Gb with an N50 of 150 Mb,  
38 and the longest scaffold covered 97.3% of GRCh38's chromosome 2. And the final assembly  
39 showed high base accuracy, less than 0.01% of base-errors.

## 40 **Conclusions**

41 KOREF\_S1v2.1 is the first chromosome-scale haploid assembly of the Korean reference genome  
42 with high contiguity and accuracy. Our study provides useful resources of the Korean reference

43 genome and demonstrates a new strategy of hybrid assembly which collaborates ONT's  
44 PromethION and PacBio's HiFi-CCS.

45 **Keywords:** Korean reference; KOREF\_S1; ONT PromethION; PacBio HiFi; Hi-C; hybrid  
46 assembly

47

48



## 49 **Introduction**

50 Since the human genome reference was released in 2003, it has been updated and recently was  
51 patched in 2019 (GRCh38.p13) by the Genome Reference Consortium (GRC) [1]. Despite high  
52 completeness of GRCh38 assembly, it derives from thirteen anonymous volunteers, mostly based  
53 on Caucasian and African ancestry [2]. It is the most precise and extensive among all human  
54 references constructed so far. Recently, due to recent cost-effective sequencing methods,  
55 especially long reads methods, one can construct human personal references fast and efficiently  
56 [3]. The first Korean reference, KOREF, has been constructed in two types [4]. The first is  
57 KOREF\_S1 which is a personal reference from an individual which is accompanied by parental  
58 *de novo* assemblies. The second one is KOREF\_C which is a consensus population reference that  
59 includes variome information of Koreans. KOREF was initiated by the Korean Ministry of Science  
60 and Technology in 2006 to generate a national genome and variome references and currently it is  
61 jointly developed by the Genome Research Foundation, National Standard Reference Research  
62 Center, and the Korean Genomics Center at UNIST (Ulsan National Institute of Science and  
63 Technology). The first version of KOREF\_S1, KOREF\_S1v1.0, had a clear limitation of short  
64 reads and long-distance mapping-based approaches that resulted in a relatively low-quality  
65 assembly compared to the current GRCh38. We used Oxford Nanopore Technologies (ONT)  
66 PromethION and PacBio HiFi sequencers to upgrade KOREF\_S1 by using a publicly available  
67 KOREF cell line.

68

## 69 **Materials and Methods**

## 70 **Sample preparation and genome sequencing**

71 Sample preparation steps were followed as the previous study [4]. Human KOREF cell lines  
72 (<http://koref.net>) were cultured at 37°C in 5% CO<sub>2</sub> in RPMI-1640 medium with 10% heat-  
73 inactivated fetal bovine serum. DNA was extracted from cells using the DNeasy Blood & Tissue  
74 kit (Qiagen) to the manufacturer's instructions. Sequencing libraries for the Oxford Nanopore  
75 Technologies PromethION were prepared using the 1D ligation sequencing kit (SQK-LSK109,  
76 Oxford Nanopore Technologies, UK) following the manufacturer's instructions. The products  
77 were quantified using the Bioanalyzer 2100 (Agilent, Santa Clara, CA, USA) and raw signals were  
78 generated by the PromethION R9.4.5 platform (Oxford Nanopore Technologies, UK). Base-  
79 calling the raw signals was performed using Guppy v4.0.11 with the Flip-flop hac model.

80 Genomic DNA from KOREF blood samples was extracted using QIAGEN Blood & Cell Culture  
81 DNA Kit (cat no 13323). A total of 5 µg of each sample was used as input for library preparation.  
82 The SMRTbell library was constructed using the SMRTbell® Express Template Preparation Kit  
83 (101-357-000). Using the BluePippin Size selection system we removed the small fragments for a  
84 large-insert library. After sequencing primer v4 was annealed to the SMRTbell template, DNA  
85 polymerase was bound to the complex (Sequel Binding kit 2.0). We purified the complex using  
86 AMPure Purification to remove excess primer and polymerase prior to sequencing. The SMRTbell  
87 library was sequenced using SMRT cells (Pacific Biosciences) using Sequel Sequencing Kit v2.1  
88 and 10 hr movies were captured for each SMRT Cell 1M v2 using the Sequel II (Pacific  
89 Biosciences) sequencing platform.

90 Hi-C libraries were generated using the Arima-Hic kit (A160105v01, San Diego, CA, USA).  
91 KOREF cell lines and blood samples were prepared for the construction of Hi-C libraries. Briefly,  
92 chromatin from cross-linked cells was solubilized and then digested using restriction enzymes

93 MboI or Arima's multiple enzymes (GATC and GANTC). The digested ends were labeled using  
94 a biotinylated nucleotide, and ends were ligated to create ligation products. Ligation products were  
95 purified, fragmented, and selected by size using AMPure XP Beads. Illumina-compatible  
96 sequencing libraries were constructed on end repair, dA-tailing, and adaptor ligation using a  
97 modified workflow of the Hyper Prep kit (KAPA Biosystems, Inc.). The bead-bound libraries were  
98 amplified and purified using AMPure XP beads and sequenced using Illumina NovaSeq platform  
99 with a read-length of 150 bp by Novogene (Beijing, China).

100 Short paired-end raw reads using Illumina HiSeq 2000 platform were acquired from a previous  
101 study, accession no. SRR2204706 (<ftp://ftp.sra.ebi.ac.uk/vol1/srr/SRR220/006/SRR2204706>).

102 For generating parental sequencing reads, we prepared samples from both of KOREF\_S1's parents.  
103 DNA was extracted from the donor's blood using DNAeasy Blood & Tissue Kit from QIAGEN  
104 according to the manufacturer's instruction. The quality and concentration of the extracted DNA  
105 were evaluated using NanoDrop™ One/OneC UV-Vis Spectrophotometer (Thermo Scientific™).  
106 Library construction and whole-genome sequencing were performed by Illumina HiSeq platform  
107 (Illumina, USA) with a 100 bp paired-end sequencing.

108

## 109 **Preprocessing of sequenced reads**

110 The sequenced long- and short-read data were performed preprocessing steps as adapter trimming,  
111 quality trimming, and error correction. For the long reads, adapter trimming was performed using  
112 Porechop v0.2.4 (<https://github.com/rrwick/Porechop>) (Porechop, RRID:SCR\_016967) and  
113 removing reads with below quality-score 7 was performed using Guppy. For the short reads,  
114 adapter- and quality trimming were performed using Trimmomatic v0.39 [5] (Trimmomatic,  
115 RRID:SCR\_011848), and an error correction was performed using the tadpole.sh program of

116 BBtools suite v38.26 (<https://jgi.doe.gov/data-and-tools/bbtools>) (Bestus Bioinformaticus Tools,  
117 RRID:SCR\_016968).

118

## 119 **Trio-binning and read correction**

120 To obtain more accurate and longer haplotype-resolved reads from ONT PromethION sequencing,  
121 we applied a trio-binning with KOREF's parental sequencing data and an error-correction with  
122 PacBio HiFi sequencing data. The whole procedure is described in figure 1. To obtain haplotype-  
123 resolved reads from ONT PromethION and PacBio HiFi sequencing, we performed a trio-binning  
124 using TrioCanu v2.1 [6] (Canu, RRID:SCR\_015880) with the parental short-reads. In this step,  
125 reads from eleven PromethION flow-cells and six PacBio HiFi cells were participated. We merged  
126 unclassified reads to the classified paternal-reads and classified maternal-reads each. To correct  
127 base-errors on the PromethION reads, we corrected the errors with the haplotype-resolved reads  
128 from PacBio HiFi sequencing using Racon v1.4.3 [7] (Racon, RRID:SCR\_017642). We acquired  
129 KOREF's parental sequencing data from the KOREF homepage  
130 ([http://koref.net/KOREF\\_Data\\_Download](http://koref.net/KOREF_Data_Download)).

131

## 132 ***De novo* assembly of KOREF\_S1 genome**

133 Contig assembly was processed using wtdbg2 v2.5 [8] (WTDBG, RRID:SCR\_017225) and Flye  
134 assembler v2.8.1 [9] (Flye, RRID:SCR\_017016). For a wtdbg2 assembly, parameters were set as  
135 '-x corrected -g 3g -L 5000 -X 70.0'. An error correction of the assembled contigs was conducted  
136 using Racon with a single iteration. The Flye assembly was performed with parameters of '--

137 pacbio-hifi --hifi-error 0.008 --genome-size 3g'. For error correction, we carried out the same  
138 procedure as the wtdbg2 assembly.

139 To construct scaffolds with a chromosome-scale, we conduct scaffolding using PromethION reads  
140 and Hi-C data. To scaffold contigs using PromethION reads, LINKS v1.8.7 [10] was used with a  
141 single flow-cell of PromethION reads. To construct chromosome-scale scaffolds using Hi-C data,  
142 3D-DNA pipeline v180922 [11] with Juicer v1.6.2 program [12] (Juicer, RRID:SCR\_017226) was  
143 performed with the scaffolds by LINKS. Hi-C raw reads were mapped against the extended contigs  
144 using Juicer, and the 3D-DNA pipeline was initiated to correct mis-joined contigs and construct  
145 scaffolds. To correct misassemblies on the scaffolds, a manual curation was performed using JBAT  
146 (JuiceBox Assembly Tool) v1.11.08 program (<https://github.com/aidenlab/Juicebox>) (Juicebox,  
147 RRID:SCR\_021172). To polish base-errors and small indels, we performed Pilon v1.23 program  
148 [13] (Pilon, RRID:SCR\_014731) with KOREF's short read data and parameters of '--fix snps and  
149 indels' were used.

150

## 151 **Constructing high-confident regions, and the assessment of base-errors on** 152 **long-reads and genome assemblies**

153 For an assessment of base-errors, we constructed high-confident regions of KOREF\_S1 v1 against  
154 chromosome sequences of the GRCh38.p13. The procedure was referred to Heng Li's study [14].  
155 We aligned the KOREF\_S1v1.0 assembly to GRCh38 using the Minimap2 program v2.17-r941  
156 [15] (Minimap2, RRID:SCR\_018550). Alignments with mapping quality >5 and aligned segments  
157 shorter than 50 kb were discarded. The filtered alignments were converted to the BED format and  
158 sorted.

159 To assess base-errors of long-reads and genome assemblies, we compared them to the  
160 KOREF\_S1v1.0 assembly using the assembly\_assess program from Pomoxis v0.3.4  
161 (<https://github.com/nanoporetech/pomoxis>). And the Merqury v1.0 [16] program was performed  
162 to assess assemblies using k-mers.

163

## 164 **Genome annotation**

165 To identify protein coding genes on KOREF\_S1v2.1 genome, we performed a liftover with a gene  
166 annotation from GENCODE 38. The liftover was processed using Liftoff v1.6.1 program [17]. The  
167 result of genome annotation was stored in the KOREF genome browser, built by the JBrowse  
168 v1.16.9 [18] (JBrowse, RRID:SCR\_001004). To assess protein-coding genes, BUSCO analysis  
169 (<https://busco.ezlab.org>) (BUSCO, RRID:SCR\_015008) was performed using BUSCO v5.2.2 and  
170 mammalian orthoDB v10.

171

## 172 **Results**

### 173 **KOREF\_S1v2.1 assembly**

174 We obtained 235× coverage (705 Gb) of long-reads from twelve ONT PromethION flow-cells and  
175 38× coverage (114 Gb) of long reads from six PacBio HiFi cells (Table S1). We also acquired 274  
176 Gb corrected paternal haplotype-resolved reads and 265 Gb corrected maternal haplotype-resolved  
177 reads after trio-binning and read-correction. An N50 of PromethION sequencing ranged from  
178 6,793 bp to 18,109 bp and an N50 of PacBio HiFi ranged from 11,846 bp to 15,901 bp. About

179 lengths of the longest read, PromethION ranged from 160,294 bp to 1,753,381 bp and PacBio HiFi  
180 ranged from 28,947 bp to 36,401 bp. The corrected reads were identified about 1.4% base-errors  
181 (Table S2). Contigs from both haplotypes were assembled using wtdbg2 and Flye. The Flye  
182 assembly showed better results of higher N50 values (19.47 Mb for a paternal and 25.86 Mb for a  
183 maternal assembly) and longer length of the longest contig (70.97 Mb for a paternal and 109.79  
184 Mb for a maternal assembly) (Table 1).

185 We extended the contigs to chromosome-scale scaffolds using 76.5 Gb of PromethION reads  
186 (Flow-cell no.2) and 884 Gb of Hi-C data (294× sequencing-depth). Scaffolds from a  
187 mitochondrial genome were excluded using the KOREF's mtDNA sequence from the previous  
188 study [4]. As a result, we acquired the paternal assembly of 2.82 Gb length with 2,230 scaffolds  
189 and an N50 of 141.04 Mb (Table 1). The maternal assembly resulted in 2,616 scaffolds with an  
190 N50 of 150.05 Mb, and its total length was 2.88 Gb. For generating the final assembly of  
191 KOREF\_S1v2.1, we substituted sequences of autosomal chromosomes and a Y chromosome from  
192 the paternal assembly, and a X chromosome from the maternal assembly. As a result, the  
193 KOREF\_S1v2.1 was acquired a total length of 2.9 Gb with an N50 of 150.05 Mb.

194

## 195 **Genome annotation**

196 We annotated genes in KOREF\_S1v2.1 by integrating a liftover of gene annotations from the  
197 GENCODE release 38 (<https://www.genencodegenes.org/human/>) and homology information of  
198 RNASeq data. The genes included 19,668 protein-coding genes with 85,889 transcripts, 46,973  
199 lncRNAs and 17,535 pseudogenes (Table 3). From assessment of protein-coding genes by BUSCO,  
200 99.3% of complete orthologous genes were found and 0.6% were missing (Table 4). 1,391 genes

201 from the Gencode38 annotation were not transferred to the KOREF by liftover, and a list of these  
202 genes can be found in the supplementary table 4.

203

## 204 **Assessment of KOREF and comparison with other human genome assemblies**

205 Using the Merqury program for a quality assessment, we estimated QV scores of Q43.88 for the  
206 paternal assembly and Q44.49 for the maternal assembly. The final assembly showed QV score of  
207 Q43.88, indicating >99.99% accuracy (Table S5), and it is higher than KOREF\_S1v1.0's (Q33.58)  
208 and KOREF\_S1v2.0 (Q39.52) which were assembled with the PromethION data. We  
209 compared KOREF\_S1v2.1 and other human reference genome assemblies (AK1\_v2, JG2.0.0 Beta,  
210 HuRef, CHM13\_v1.1, GRCh38.p13, Ash1v2.0 and PR1 v3.0) [19-24]. The results showed that  
211 KOREF\_S1v2.1 has a longer scaffold N50 than AK1, HuRef, Ash1 and PR1, and scaffold N50  
212 was comparable to JG2.0.0 Beta and CHM13\_v1.1 (Table 2). Among these eight genome  
213 assemblies, KOREF\_S1v2.1 and CHM13 were the only haplotype-resolved assemblies at a  
214 chromosome-scale, though KOREF\_S1v2.1 has lower QV, shorter contigs, and is missing 8-10%  
215 of the human genome sequence included in CHM13\_v1.1. KOREF\_S1v2.1 also has longer  
216 scaffolds than recent trio-hifiasm-based assemblies, but has shorter contig N50, lower QV, and  
217 substantially lower completeness. AK1 was haplotype-resolved using a read-based phasing  
218 method but could not reach a chromosome-scale without a guidance of the reference genome.

219 To identify missing regions on KOREF\_S1v2.1, we made an alignment plot of KOREF against  
220 CHM13 v1.1 using Mummer v4.0.0beta2 (<http://mummer.sourceforge.net>) (MUMmer,  
221 RRID:SCR\_018171) and Dot (<https://github.com/marianattestad/dot>). We found long missing  
222 sequences on centromeric regions (Fig. S1). On chromosome one, about 29 Mb was missing and



223 they were located on a centromeric region. On chromosome X, missing sequences of a centromeric  
224 region were a length of about 4 Mb (Fig. S2).

225 From a pilot study of KOREF\_S1's PacBio HiFi sequencing by Hifiasm v0.15.5-r352 [25]  
226 (Hifiasm, RRID:SCR\_021069), a contig assembly (KOREF\_S1v2.0\_PBCCS hifiasm\_trio)  
227 resulted in highest base-accuracy and contiguity between HiFi-only, PromethION, and HiFi-  
228 PromethION hybrid assembly (Table S3). About haploid completeness, it scored 99.6873%  
229 (maternal) and 99.1902% (paternal), which showed 8~9% higher than KOREF\_S1v2.1 assembly.

230 For comparing assembly quality of HiFi, PromethION and HiFi-PromethION hybrid, we  
231 compared contigs assemblies from HG00744, HG002, and KOREF. HiFi assemblies showed  
232 highest QV and NG50 (Table 5). HG002 assembly showed highest QV of 51.6 and PromethION  
233 assembly of KOREF showed lowest QV of 33.8. HiFi-PromethION hybrid assembly of KOREF  
234 scored higher QV (42.2) against PromethION assembly. But it was lower than the HiFi assembly  
235 of KOREF (QV 45.1).

236

## 237 **Discussion**

238 In previous version of KOREF\_S1, we generated a chromosome-level genome assembly with a  
239 guidance of GRCh38. A new version of KOREF assembly, KOREF\_S1v2.1, was assembled with  
240 high accurate (less than 0.01% of base error) and contiguity from multiple sequencing technologies  
241 including ONT, PacBio, Illumina, and Hi-C. Furthermore, the new KOREF assembly was phased  
242 with parental sequencing data. To generate ultra-long and high accurate reads, we corrected ONT  
243 reads using PacBio HiFi reads. Most genomic regions were covered by the corrected reads, but

244 some highly competitive regions including telomere and centromere were not covered. They were  
245 remained as gaps with unknown length. Especially on a chromosome Y, we found more gaps and  
246 less contiguity than other chromosomes. The genomic sequences of a chromosome X and Y have  
247 high similar regions and they probably make difficulties to phase genomic sequences on sex  
248 chromosomes.

249 Recently, new *de novo* assembly pipelines, such as the Hifiasm [25] and HiCanu [26], have been  
250 developed for PacBio's HiFi-CCS. Hifiasm supports a trio-binning from parental sequencing and  
251 Hi-C. From a pilot study by Hifiasm, a contig assembly of hifiasm\_trio showed the highest base-  
252 accuracy and contiguity (Table S3). About haploid completeness, it also showed the highest value,  
253 8~9% more against KOREF\_S1v2.1. Despite these advantages, scaffolding contigs from Hifiasm  
254 has difficulties for using Hi-C data. Error-correction modules of the 3D-DNA pipeline seemed to  
255 split long repetitive sequences complicatedly and made it difficult to construct scaffolds or curate  
256 misassemblies (Fig. S3). [Fig. S3-A shows a Hi-C heat map of contigs without correcting](#)  
257 [misassemblies and Fig. S3-B shows a Hi-C heat map of contigs/scaffolds with correcting](#)  
258 [misassemblies. On Fig. S3-A, we can find white stripe patterns from long repetitive regions, such](#)  
259 [as centromeres or telomeres, in contigs or on the border of contigs. However, on Fig. S3-B, a small](#)  
260 [number of white stripes were found in scaffolds. And we found a large amount of short contigs](#)  
261 [with long repetitive sequences that have appeared to come from centromeres or telomeres. Its](#)  
262 [length reaches 160 Mb. The developers of 3D-DNA pipeline already have warned this on their](#)  
263 [github page.](#) In order to avoid this problem, we needed a new strategy that enabled to correct local  
264 misassemblies on long repetitive regions by Hi-C sequencing. However, the high-quality contigs  
265 from Hifiasm can be helpful to remove gaps and showed possibility to resolve highly repetitive

266 regions. Also, a recent study of the T2T consortium shared a complete structure of centromeric  
267 regions [22], and it will be a useful resource to complete the KOREF\_S1 genome.

268 In conclusion, we upgraded a high-quality Korean reference genome, KOREF. Our study provides  
269 useful resources of the Korean reference genome and demonstrates a new strategy of hybrid  
270 assembly which collaborates ONT's PromethION and PacBio's HiFi-CCS.

271

## 272 **Data availability**

273 The Korean reference genome project has been deposited at DDBJ/ENA/GenBank under the  
274 accession PRJNA735947. The version described in this paper is version JHRJT000000000. Raw  
275 DNA and RNA sequence reads for KOREF and KPGP have been submitted to the NCBI Sequence  
276 Read Archive database (from SRR14759111 to SRR14759134). The immortalized cell line of  
277 KOREF was deposited in the Korean Cell Line Bank (KCLB, #60211). KOREF\_S1 data is found  
278 from <http://koreanreference.org>

279

## 280 **Competing financial interests**

281 The authors declare no competing financial interests.

282

## 283 **Funding**

284 This work was supported by the Promotion of Innovative Businesses for Regulation-Free Special  
285 Zones funded by the Ministry of SMEs and Startups (MSS, Korea)(P0016193).

286

287 **Author contributions**

288 J.B. supervised and coordinated the national Korean reference genome project and Personal  
289 Genome Project Korea. J.B. conceived and designed the reference genome project. H.K.  
290 performed the analyses and assembly. H.K. and J.B. wrote the manuscript.

291

292 **Acknowledgements**

293 This work was supported by the Ministry of Trade, Industry & Energy (MOTIE, Korea) under  
294 Industrial Technology Innovation Programs (‘Pilot study of building of Korean Reference  
295 Standard Genome map’, No.10046043; ‘Developing Korean Reference Genome’, No.10050164;  
296 and ‘National Center for Standard Reference Data’, No.10063239) and Industrial Strategic  
297 Technology Development Program (‘Bioinformatics platform development for next generation  
298 bioinformation analysis’, No.10040231). Korea Institute of Science and Technology Information  
299 (KISTI) provided us with Korea Research Environment Open NETwork (KREONET) which is  
300 the internet connection service for efficient information and data transfer. We thank Jaesu Bhak  
301 for editing the manuscript.

302

303 **References**

- 304 1. Schneider VA, Graves-Lindsay T, Howe K, Bouk N, Chen HC, Kitts PA, et al. Evaluation of  
305 GRCh38 and de novo haploid genome assemblies demonstrates the enduring quality of  
306 the reference assembly. *Genome Res.* 2017;27 5:849-64. doi:10.1101/gr.213611.116.
- 307 2. Green RE, Krause J, Briggs AW, Maricic T, Stenzel U, Kircher M, et al. A Draft Sequence of  
308 the Neandertal Genome. *Science.* 2010;328 5979:710-22. doi:10.1126/science.1188021.
- 309 3. Logsdon GA, Vollger MR and Eichler EE. Long-read human genome sequencing and its  
310 applications. *Nat Rev Genet.* 2020;21 10:597-614. doi:10.1038/s41576-020-0236-x.

- 311 4. Cho YS, Kim H, Kim HM, Jho S, Jun J, Lee YJ, et al. An ethnically relevant consensus Korean  
312 reference genome is a step towards personal reference genomes. *Nat Commun.* 2016;7  
313 doi:ARTN 13637 10.1038/ncomms13637.
- 314 5. Bolger AM, Lohse M and Usadel B. Trimmomatic: a flexible trimmer for Illumina sequence  
315 data. *Bioinformatics.* 2014;30 15:2114-20. doi:10.1093/bioinformatics/btu170.
- 316 6. Koren S, Rhie A, Walenz BP, Dilthey AT, Bickhart DM, Kingan SB, et al. De novo assembly  
317 of haplotype-resolved genomes with trio binning. *Nat Biotechnol.* 2018;  
318 doi:10.1038/nbt.4277.
- 319 7. Vaser R, Sovic I, Nagarajan N and Sikic M. Fast and accurate de novo genome assembly  
320 from long uncorrected reads. *Genome Res.* 2017;27 5:737-46.  
321 doi:10.1101/gr.214270.116.
- 322 8. Ruan J and Li H. Fast and accurate long-read assembly with wtdbg2. *Nat Methods.*  
323 2020;17 2:155-+. doi:10.1038/s41592-019-0669-3.
- 324 9. Kolmogorov M, Yuan J, Lin Y and Pevzner PA. Assembly of long, error-prone reads using  
325 repeat graphs. *Nat Biotechnol.* 2019;37 5:540-+. doi:10.1038/s41587-019-0072-8.
- 326 10. Warren RL, Yang C, Vandervalk BP, Behsaz B, Lagman A, Jones SJM, et al. LINKS: Scalable,  
327 alignment-free scaffolding of draft genomes with long reads. *Gigascience.* 2015;4  
328 doi:ARTN 35 10.1186/s13742-015-0076-3.
- 329 11. Dudchenko O, Batra SS, Omer AD, Nyquist SK, Hoeger M, Durand NC, et al. De novo  
330 assembly of the *Aedes aegypti* genome using Hi-C yields chromosome-length scaffolds.  
331 *Science.* 2017;356 6333:92-5. doi:10.1126/science.aal3327.
- 332 12. Durand NC, Shamim MS, Machol I, Rao SS, Huntley MH, Lander ES, et al. Juicer Provides a  
333 One-Click System for Analyzing Loop-Resolution Hi-C Experiments. *Cell Syst.* 2016;3 1:95-  
334 8. doi:10.1016/j.cels.2016.07.002.
- 335 13. Walker BJ, Abeel T, Shea T, Priest M, Abouelliel A, Sakthikumar S, et al. Pilon: An  
336 Integrated Tool for Comprehensive Microbial Variant Detection and Genome Assembly  
337 Improvement. *Plos One.* 2014;9 11 doi:ARTN e112963 10.1371/journal.pone.0112963.
- 338 14. Li H, Bloom JM, Farjoun Y, Fleharty M, Gauthier L, Neale B, et al. A synthetic-diploid  
339 benchmark for accurate variant-calling evaluation. *Nat Methods.* 2018;15 8:595-7.  
340 doi:10.1038/s41592-018-0054-7.
- 341 15. Li H. Minimap2: pairwise alignment for nucleotide sequences. *Bioinformatics.* 2018;34  
342 18:3094-100. doi:10.1093/bioinformatics/bty191.
- 343 16. Shumate A and Salzberg SL. Liftoff: accurate mapping of gene annotations.  
344 *Bioinformatics.* 2020; doi:10.1093/bioinformatics/btaa1016.
- 345 17. Pertea M, Pertea GM, Antonescu CM, Chang TC, Mendell JT and Salzberg SL. StringTie  
346 enables improved reconstruction of a transcriptome from RNA-seq reads. *Nat*  
347 *Biotechnol.* 2015;33 3:290-5. doi:10.1038/nbt.3122.
- 348 18. Rhie A, Walenz BP, Koren S and Phillippy AM. Merqury: reference-free quality,  
349 completeness, and phasing assessment for genome assemblies. *Genome Biol.* 2020;21  
350 1:245. doi:10.1186/s13059-020-02134-9.
- 351 19. Seo JS, Rhie A, Kim J, Lee S, Sohn MH, Kim CU, et al. De novo assembly and phasing of a  
352 Korean human genome. *Nature.* 2016;538 7624:243-+. doi:10.1038/nature20098.

- 353 20. Takayama J, Tadaka S, Yano K, Katsuoka F, Gocho C, Funayama T, et al. Construction and  
354 integration of three de novo Japanese human genome assemblies toward a population-  
355 specific reference. *Nat Commun.* 2021;12 1:226. doi:10.1038/s41467-020-20146-8.
- 356 21. Levy S, Sutton G, Ng PC, Feuk L, Halpern AL, Walenz BP, et al. The diploid genome  
357 sequence of an individual human. *PLoS Biol.* 2007;5 10:e254.  
358 doi:10.1371/journal.pbio.0050254.
- 359 22. Nurk S, Koren S, Rhie A, Rautiainen M, Bzikadze AV, Mikheenko A, et al. The complete  
360 sequence of a human genome. *bioRxiv.* 2021.
- 361 23. Alaina S, Aleksey VZ, Rachel MS, Daniela P, Justin MW, Nathan DO, et al. Assembly and  
362 annotation of an Ashkenazi human reference genome. *Genome Biol.* 202;21:129.  
363 doi:10.1186/s13059-020-02047-7.
- 364 24. Aleksey Z, Alaina S, Ida S, Jakob H, Daniela P, Mihaela P, et al. A reference-quality, fully  
365 annotated genome from a Puerto Rican individual. *bioRxiv.* 2021.
- 366 25. Cheng H, Concepcion GT, Feng X, Zhang H and Li H. Haplotype-resolved de novo  
367 assembly using phased assembly graphs with hifiasm. *Nat Methods.* 2021;18 2:170-5.  
368 doi:10.1038/s41592-020-01056-5.
- 369 26. Nurk S, Walenz BP, Rhie A, Vollger MR, Logsdon GA, Grothe R, et al. HiCanu: accurate  
370 assembly of segmental duplications, satellites, and allelic variants from high-fidelity long  
371 reads. *Genome Res.* 2020;30 9:1291-305. doi:10.1101/gr.263566.120.

372

373

374

375 **Figures**

376

377 **Figure 1. The flowchart of KOREF reference genome assembly**

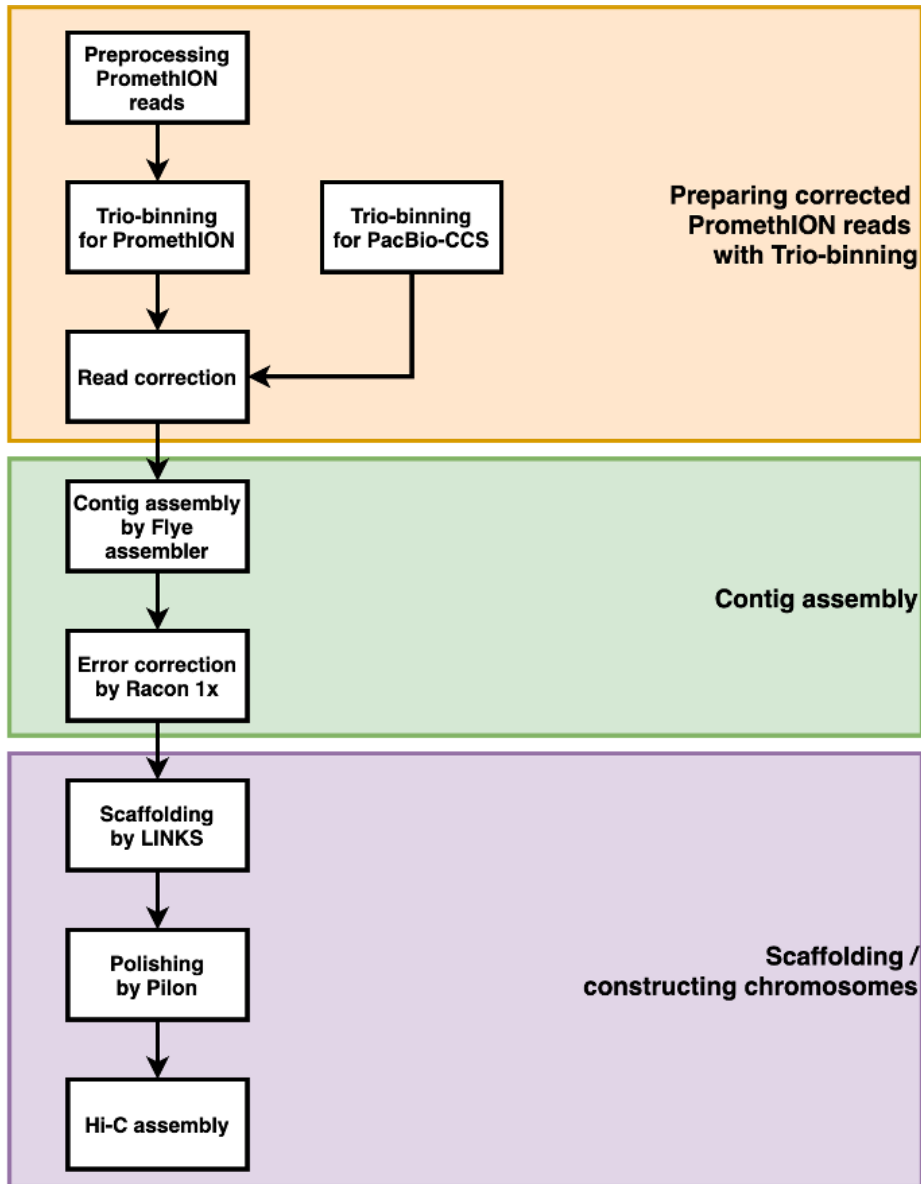

378

379

380 **Tables**

381

382 **Table 1. The statistics of KOREF\_S1v2.1 assembly**

|                   | Contig          |               |                 |               | Scaffold      |               |
|-------------------|-----------------|---------------|-----------------|---------------|---------------|---------------|
|                   | Wtdbg2_paternal | Flye_paternal | Wtdbg2_maternal | Flye_maternal | Paternal      | Maternal      |
| Sequence no.      | 3,059           | 2,973         | 2,426           | 2,475         | 2,230         | 2,616         |
| Total length (bp) | 2,652,350,533   | 2,820,210,305 | 2,691,371,348   | 2,885,670,065 | 2,821,407,033 | 2,886,600,011 |
| N50 (bp)          | 15,085,508      | 19,472,363    | 15,312,743      | 25,861,606    | 141,044,433   | 150,051,441   |
| Longest (bp)      | 70,969,653      | 87,371,841    | 70,444,093      | 109,786,075   | 235,665,501   | 234,237,609   |
| Gaps              | 0.000%          | 0.000%        | 0.000%          | 0.000%        | 0.048%        | 0.037%        |
| GC contents       | 40.90%          | 40.92%        | 40.84%          | 40.86%        | 40.92%        | 40.88%        |

383



384 **Table 2. Comparison between KOREF and other human genomes**

|                    | KOREF_S1v2.1  | AK1_v2        | JG2.0.0 Beta  | HuRef            | CHM13 v1.1        | GRCh38.p13    | Ash1v2.0         | PR1 v3.0      |
|--------------------|---------------|---------------|---------------|------------------|-------------------|---------------|------------------|---------------|
| Scaffolds no.      | 2,230         | 2,832         | 1,173         | 4,530            | 24                | 472           | 334              | 89            |
| Total length (bp)  | 2,901,828,151 | 2,904,207,228 | 3,059,652,438 | 2,844,000,504    | 3,054,832,041     | 3,272,089,205 | 3,188,555,634    | 3,116,169,811 |
| Scaffold N50 (bp)  | 150,051,441   | 44,846,623    | 152,668,378   | 143,733,266      | 154,259,566       | 67,794,783    | 146,254,838      | 149,697,505   |
| Phasing approach   | De novo       | De novo       | De novo       | Reference-guided | De novo           | De novo       | Reference-guided | De novo*      |
| Assembly level     | Chromosome    | Scaffold      | Chromosome    | Chromosome       | Chromosome        | Chromosome    | Chromosome       | Chromosome    |
| Haplotype-resolved | Trio-binning  | Read-based    | No            | No               | Haploid cell line | No            | No               | No            |

385 \* PR1 v3.0 assembly used CHM13 assembly as a reference genome to remove gaps.

386

387

388 **Table 3. The statistics of KOREF reference genome annotation**

| <b>KOREF_S1v2.1 gene</b>         |             |
|----------------------------------|-------------|
| Genes no.                        | 19,668      |
| Transcripts no.                  | 85,889      |
| Total length of transcripts (bp) | 110,601,598 |
| N50 (bp)                         | 1,983       |
| Length of longest transcripts    | 107,976     |
| GC contents                      | 51.60%      |
| lncRNAs no.                      | 46,973      |
| Pseudogenes no.                  | 17,535      |

389

390 **Table 4. Statistics of KOREF\_S1v2.1 protein coding genes using BUSCO**

| <b>BUSCO assessment</b>  | <b>KOREF_S1v2.1 protein coding genes<sup>391</sup></b> |
|--------------------------|--------------------------------------------------------|
| Complete                 | 99.3%<br>392                                           |
| Complete and single-copy | 40.9%                                                  |
| Complete and duplicated  | 58.4%                                                  |
| Fragmented               | 0.1%                                                   |
| Missing                  | 0.6%                                                   |

393 **Table 5. Comparison of contigs from HG00733, HG002 and KOREF assembly**

| <b>Dataset</b> | <b>Seq. platform</b>        | <b>Assembly</b> | <b>Size (Gb)</b> | <b>QV</b> | <b>NG50 (Mb)</b> |
|----------------|-----------------------------|-----------------|------------------|-----------|------------------|
| HG00733        | PB HiFi                     | Hifiasm (trio)  | 6.071            | 49.9      | 34.9             |
| HG002          | PB HiFi                     | Hifiasm (trio)  | 5.967            | 51.6      | 43.0             |
| KOREF          | PB HiFi                     | Hifiasm (trio)  | 5.927            | 45.1      | 55.4             |
| KOREF          | PromethION R9.4.1           | wtdbg2 (trio)   | 5.527            | 33.8      | 9.3              |
| KOREF          | PB HiFi - PromethION hybrid | Flye (trio)     | 5.706            | 42.2      | 16.5             |

394

395

**Table S1. The statistics of sequencing data for KOREF assembly**

| <b>Library name</b> | <b>Library type</b> | <b>Sequencer</b> | <b>No of reads</b> | <b>Total length of reads</b> |
|---------------------|---------------------|------------------|--------------------|------------------------------|
| KOREF_FC0           | Long read           | ONT PromethION   | 3,312,776          | 20,865,481,179               |
| KOREF_FC1           | Long read           | ONT PromethION   | 5,042,850          | 41,682,677,298               |
| KOREF_FC2           | Long read           | ONT PromethION   | 12,338,494         | 76,503,664,100               |
| KOREF_FC3           | Long read           | ONT PromethION   | 10,235,778         | 45,485,905,527               |
| KOREF_FC4           | Long read           | ONT PromethION   | 16,631,685         | 61,519,105,457               |
| KOREF_FC5           | Long read           | ONT PromethION   | 18,646,872         | 94,424,194,828               |
| KOREF_FC6           | Long read           | ONT PromethION   | 17,505,287         | 107,134,750,131              |
| KOREF_FC7           | Long read           | ONT PromethION   | 15,334,968         | 56,295,215,337               |
| KOREF_FC8           | Long read           | ONT PromethION   | 2,355,945          | 11,961,112,778               |
| KOREF_FC9           | Long read           | ONT PromethION   | 12,904,534         | 87,895,961,842               |
| KOREF_FC10          | Long read           | ONT PromethION   | 8,241,801          | 45,637,914,742               |
| KOREF_FC11          | Long read           | ONT PromethION   | 9,237,075          | 55,586,698,463               |
| KOREF_PBCCS_FC1     | Long read           | PacBio HiFi-CCS  | 851,009            | 13,490,105,391               |
| KOREF_PBCCS_FC2     | Long read           | PacBio HiFi-CCS  | 716,451            | 11,376,688,499               |
| KOREF_PBCCS_FC3     | Long read           | PacBio HiFi-CCS  | 951,653            | 15,081,743,678               |
| KOREF_PBCCS_FC4     | Long read           | PacBio HiFi-CCS  | 2,250,696          | 31,928,570,225               |
| KOREF_PBCCS_FC5     | Long read           | PacBio HiFi-CCS  | 1,637,317          | 19,173,274,135               |
| KOREF_PBCCS_FC6     | Long read           | PacBio HiFi-CCS  | 1,966,687          | 23,104,807,610               |
| K5_mbol             | Hi-C                | Illumina         | 678,687,678        | 101,803,151,700              |
| WBC_mbol            | Hi-C                | Illumina         | 1,030,159,562      | 152,405,701,620              |
| K5_combo            | Hi-C                | Illumina         | 1,159,354,242      | 173,903,136,300              |
| WBC_combo           | Hi-C                | Illumina         | 640,984,808        | 96,147,721,200               |
| KOREF_HiC           | Hi-C                | Illumina         | 2,383,095,442      | 359,847,411,742              |

| <b>N50 of reads</b> | <b>Length of the longest reads</b> |
|---------------------|------------------------------------|
| 13,367              | 1,042,663                          |
| 18,109              | 1,753,381                          |
| 13,471              | 864,374                            |
| 8,575               | 837,815                            |
| 7,219               | 694,220                            |
| 10,637              | 890,851                            |
| 13,118              | 697,847                            |
| 6,793               | 504,030                            |
| 9,794               | 139,596                            |
| 14,725              | 129,808                            |
| 12,625              | 176,495                            |
| 13,369              | 160,294                            |
| 15,870              | 33,546                             |
| 15,901              | 30,931                             |
| 15,867              | 36,401                             |
| 14,338              | 33,979                             |
| 11,816              | 28,947                             |
| 11,840              | 33,434                             |
| 150                 | 150                                |
| 147                 | 147                                |
| 150                 | 150                                |
| 150                 | 150                                |
| 151                 | 151                                |

**Table S2. Base accuracy of raw and corrected ONT long-reads**

|              | <b>Error rate on Paternal</b> | <b>Error rate on Maternal</b> |
|--------------|-------------------------------|-------------------------------|
| FC0          | 1.497%                        | 1.534%                        |
| FC1          | 1.539%                        | 1.537%                        |
| FC2          | 1.401%                        | 1.412%                        |
| FC3          | 1.206%                        | 1.200%                        |
| FC4          | 1.248%                        | 1.269%                        |
| FC5          | 1.297%                        | 1.288%                        |
| FC6          | 1.474%                        | 1.488%                        |
| FC7          | 1.278%                        | 1.294%                        |
| FC8          | 1.684%                        | 1.719%                        |
| FC9          | 1.370%                        | 1.370%                        |
| FC10         | 1.330%                        | 1.318%                        |
| FC11         | 1.509%                        | 1.533%                        |
| <b>Total</b> | <b>1.408%</b>                 |                               |

**Table S3. Assessment of KOREF genome assemblies using Merqury**

| Assembly level | Assembly name                        | Haploid info. | QV         | Error rate | Total completeness (%) | Haploid completeness (%) |
|----------------|--------------------------------------|---------------|------------|------------|------------------------|--------------------------|
| Contigs        | KOREF_S1v2.0_PT                      | Maternal      | 33.8043    | 0.00041646 | 95.3942                | 88.3218                  |
|                |                                      | Paternal      | 33.7619    | 0.00042054 | 94.1992                | 89.4112                  |
|                |                                      | Both          | 33.7833    | 0.00041848 | 98.5486                | N/A                      |
|                | KOREF_S1v2.0_PBCCS<br>(wtdbg2)       | Maternal      | 44.0176    | 0.00003965 | 95.3942                | 88.3218                  |
|                |                                      | Paternal      | 43.9261    | 0.00004049 | 94.1992                | 89.4112                  |
|                |                                      | Both          | 43.9719    | 0.00004007 | 98.5486                | N/A                      |
|                | KOREF_S1v2.0_PBCCS<br>(hifiasm_trio) | Maternal      | 45.1250    | 0.00003073 | 97.8435                | 99.6873                  |
|                |                                      | Paternal      | 45.1054    | 0.00003086 | 93.825                 | 99.1902                  |
|                |                                      | Both          | 45.1154    | 0.00003079 | 99.8751                | N/A                      |
|                | KOREF_S1v2.1                         | Maternal      | 43.7455    | 0.00004221 | 97.4445                | 90.5411                  |
|                |                                      | Paternal      | 41.0087    | 0.00007927 | 95.561                 | 91.6752                  |
|                |                                      | Both          | 42.1805    | 0.00006053 | 99.3284                | N/A                      |
| Chromosomes    | KOREF_S1v1.0                         | Diploid       | 33.5807    | 0.00043846 | 97.0471                | N/A                      |
|                | KOREF_S1v2.0_PT                      | Maternal      | 39.5177    | 0.00011175 | 96.9514                | 82.8504                  |
|                |                                      | Paternal      | 39.5263    | 0.00011153 | 95.0758                | 85.9729                  |
|                |                                      | Both          | 39.5219    | 0.00011164 | 98.9057                | N/A                      |
|                | KOREF_S1v2.1                         | Maternal      | 44.4916    | 0.00003555 | 97.5563                | 90.5983                  |
|                |                                      | Paternal      | 43.3409    | 0.00004633 | 95.7252                | 91.8444                  |
|                | Both                                 | 43.8849       | 0.00004088 | 99.4084    | N/A                    |                          |

**Table S4. The list of genes which were not participated in LiftOver**

**Gene name**

---

ENSG00000225972.1  
ENSG00000251823.2  
ENSG00000263526.1  
ENSG00000278791.1  
ENSG00000281133.1  
ENSG00000281825.1  
ENSG00000264603.1  
ENSG00000255972.1  
ENSG00000256353.1  
ENSG00000258173.1  
ENSG00000277052.1  
ENSG00000238500.1  
ENSG00000282993.1  
ENSG00000211826.1  
ENSG00000211842.1  
ENSG00000211865.1  
ENSG00000211900.2  
ENSG00000211904.2  
ENSG00000211905.1  
ENSG00000211907.1  
ENSG00000211909.1  
ENSG00000211911.1  
ENSG00000211912.1  
ENSG00000211914.1  
ENSG00000211915.1  
ENSG00000211917.1  
ENSG00000211918.1  
ENSG00000211920.1  
ENSG00000211921.1  
ENSG00000211923.1  
ENSG00000211924.1  
ENSG00000211925.1  
ENSG00000211928.1  
ENSG00000211930.1  
ENSG00000211931.1  
ENSG00000211933.2  
ENSG00000223997.1  
ENSG00000225825.1  
ENSG00000227108.1  
ENSG00000227196.1  
ENSG00000227335.1



ENSG00000227800.1  
ENSG00000228131.1  
ENSG00000228985.1  
ENSG00000232543.2  
ENSG00000233655.1  
ENSG00000236170.1  
ENSG00000236597.1  
ENSG00000237020.1  
ENSG00000237197.1  
ENSG00000237235.2  
ENSG00000237547.1  
ENSG00000240041.1  
ENSG00000242472.1  
ENSG00000242887.1  
ENSG00000253808.1  
ENSG00000253820.1  
ENSG00000254045.1  
ENSG00000257825.1  
ENSG00000259016.1  
ENSG00000270705.1  
ENSG00000280494.2  
ENSG00000221641.1  
ENSG00000259302.1  
ENSG00000259646.1  
ENSG00000270185.1  
ENSG00000270451.1  
ENSG00000270824.1  
ENSG00000270961.1  
ENSG00000271317.1  
ENSG00000271336.1  
ENSG00000282089.1  
ENSG00000282268.1  
ENSG00000282520.1  
ENSG00000282599.1  
ENSG00000283888.1  
ENSG00000264399.1  
ENSG00000265561.2  
ENSG00000266416.1  
ENSG00000212051.1  
ENSG00000284239.1  
ENSG00000252191.1  
ENSG00000273837.1  
ENSG00000275726.1

ENSG00000282732.1  
ENSG00000283673.1  
ENSG00000211593.2  
ENSG00000211594.2  
ENSG00000211595.2  
ENSG00000211596.3  
ENSG00000211597.2  
ENSG00000264041.2  
ENSG00000277842.1  
ENSG00000283591.1  
ENSG00000271523.1  
ENSG00000284125.1  
ENSG00000211680.2  
ENSG00000211684.2  
ENSG00000238584.1  
ENSG00000232167.1  
ENSG00000239255.1  
ENSG00000265483.1  
ENSG00000249472.1  
ENSG00000251816.1  
ENSG00000266270.1  
ENSG00000271544.1  
ENSG00000264233.1  
ENSG00000280665.1  
ENSG00000211764.1  
ENSG00000211765.1  
ENSG00000211766.1  
ENSG00000252866.1  
ENSG00000282320.1  
ENSG00000282420.1  
ENSG00000282431.1  
ENSG00000282780.1  
ENSG00000284261.1  
ENSG00000252521.1  
ENSG00000276277.1  
ENSG00000283146.1  
ENSG00000221081.1  
ENSG00000224931.4  
ENSG00000272681.2  
ENSG00000273773.1  
ENSG00000275110.1  
ENSG00000278803.2  
ENSG00000279245.1

ENSG00000280249.1  
ENSG00000275882.1  
ENSG00000227232.5  
ENSG00000278267.1  
ENSG00000268020.3  
ENSG00000236601.2  
ENSG00000235146.2  
ENSG00000237973.1  
ENSG00000229344.1  
ENSG00000240409.1  
ENSG00000248527.1  
ENSG00000198744.5  
ENSG00000116721.9  
ENSG00000231103.2  
ENSG00000204510.5  
ENSG00000207434.1  
ENSG00000234064.1  
ENSG00000232423.6  
ENSG00000229571.7  
ENSG00000179412.11  
ENSG00000279169.3  
ENSG00000237700.2  
ENSG00000204480.8  
ENSG00000186301.8  
ENSG00000117122.14  
ENSG00000224183.1  
ENSG00000227207.2  
ENSG00000237763.10  
ENSG00000234441.1  
ENSG00000174876.17  
ENSG00000227408.1  
ENSG00000238122.1  
ENSG00000274642.1  
ENSG00000277313.1  
ENSG00000270392.2  
ENSG00000273694.1  
ENSG00000275933.1  
ENSG00000286106.1  
ENSG00000263353.3  
ENSG00000198019.13  
ENSG00000188610.12  
ENSG00000276118.1  
ENSG00000277095.1

ENSG00000252830.2  
ENSG00000274927.1  
ENSG00000233430.3  
ENSG00000237503.2  
ENSG00000234571.2  
ENSG00000268074.1  
ENSG00000275075.1  
ENSG00000275767.1  
ENSG00000232527.8  
ENSG00000276442.1  
ENSG00000276756.4  
ENSG00000271567.1  
ENSG00000227212.3  
ENSG00000229002.1  
ENSG00000279782.2  
ENSG00000222854.1  
ENSG00000273825.1  
ENSG00000271644.1  
ENSG00000215784.6  
ENSG00000223612.3  
ENSG00000256374.2  
ENSG00000276216.1  
ENSG00000201789.1  
ENSG00000270339.3  
ENSG00000274428.1  
ENSG00000274408.1  
ENSG00000244371.2  
ENSG00000229828.2  
ENSG00000231551.8  
ENSG00000201183.1  
ENSG00000285062.1  
ENSG00000252515.2  
ENSG00000177144.8  
ENSG00000252656.1  
ENSG00000201699.1  
ENSG00000284842.1  
ENSG00000226500.2  
ENSG00000150337.14  
ENSG00000233030.2  
ENSG00000244057.5  
ENSG00000187238.5  
ENSG00000225217.1  
ENSG00000236439.4

ENSG00000225483.1  
ENSG00000196550.11  
ENSG00000229509.1  
ENSG00000272055.1  
ENSG00000226113.1  
ENSG00000234941.1  
ENSG00000203496.9  
ENSG00000228702.1  
ENSG00000239152.1  
ENSG00000273225.4  
ENSG00000215097.3  
ENSG00000204177.10  
ENSG00000189090.8  
ENSG00000264404.3  
ENSG00000276544.1  
ENSG00000226964.1  
ENSG00000264717.5  
ENSG00000252149.1  
ENSG00000270025.2  
ENSG00000278561.1  
ENSG00000170324.21  
ENSG00000230166.1  
ENSG00000288603.1  
ENSG00000222108.1  
ENSG00000233197.1  
ENSG00000271848.2  
ENSG00000278616.1  
ENSG00000273946.1  
ENSG00000228055.3  
ENSG00000213147.3  
ENSG00000254468.2  
ENSG00000232390.3  
ENSG00000273813.1  
ENSG00000284018.1  
ENSG00000284306.1  
ENSG00000283873.1  
ENSG00000284546.1  
ENSG00000244398.1  
ENSG00000150244.12  
ENSG00000285537.1  
ENSG00000214414.9  
ENSG00000168930.13  
ENSG00000166013.11

ENSG00000254818.1  
ENSG00000254655.1  
ENSG00000204450.8  
ENSG00000237706.4  
ENSG00000204397.9  
ENSG00000249054.2  
ENSG00000171847.11  
ENSG00000164845.16  
ENSG00000214487.3  
ENSG00000214826.5  
ENSG00000212432.1  
ENSG00000013573.17  
ENSG00000257005.1  
ENSG00000280208.1  
ENSG00000279124.1  
ENSG00000279730.2  
ENSG00000279231.1  
ENSG00000268486.5  
ENSG00000276183.1  
ENSG00000215604.3  
ENSG00000233905.1  
ENSG00000285576.1  
ENSG00000227151.4  
ENSG00000234278.3  
ENSG00000283371.1  
ENSG00000258233.1  
ENSG00000257644.1  
ENSG00000257175.2  
ENSG00000257731.2  
ENSG00000258076.1  
ENSG00000257635.2  
ENSG00000277529.1  
ENSG00000278143.1  
ENSG00000222036.8  
ENSG00000225210.10  
ENSG00000286614.1  
ENSG00000278594.1  
ENSG00000196143.4  
ENSG00000277156.1  
ENSG00000244306.11  
ENSG00000287515.1  
ENSG00000274827.4  
ENSG00000278301.1

ENSG00000187537.13  
ENSG00000274649.1  
ENSG00000278184.1  
ENSG00000257432.1  
ENSG00000258324.2  
ENSG00000257493.1  
ENSG00000259045.1  
ENSG00000129515.20  
ENSG00000184227.8  
ENSG00000258408.1  
ENSG00000258605.1  
ENSG00000226777.7  
ENSG00000211966.2  
ENSG00000211974.3  
ENSG00000281990.1  
ENSG00000283571.1  
ENSG00000280411.1  
ENSG00000259769.1  
ENSG00000181984.11  
ENSG00000278497.1  
ENSG00000258916.2  
ENSG00000258707.2  
ENSG00000270685.1  
ENSG00000258590.5  
ENSG00000238478.1  
ENSG00000258420.1  
ENSG00000230031.10  
ENSG00000270831.1  
ENSG00000266545.1  
ENSG00000258494.1  
ENSG00000259698.1  
ENSG00000258771.1  
ENSG00000243059.3  
ENSG00000258684.2  
ENSG00000247765.2  
ENSG00000278522.5  
ENSG00000281347.3  
ENSG00000287345.1  
ENSG00000284834.1  
ENSG00000280709.2  
ENSG00000284988.1  
ENSG00000279639.2  
ENSG00000259324.2

ENSG00000285116.1  
ENSG00000182974.3  
ENSG00000279408.3  
ENSG00000280655.1  
ENSG00000258585.2  
ENSG00000264902.1  
ENSG00000283524.2  
ENSG00000285405.1  
ENSG00000284500.3  
ENSG00000285135.1  
ENSG00000259435.3  
ENSG00000260739.1  
ENSG00000223877.4  
ENSG00000271288.1  
ENSG00000275363.1  
ENSG00000277865.4  
ENSG00000277561.5  
ENSG00000277515.1  
ENSG00000283273.1  
ENSG00000277867.1  
ENSG00000277755.1  
ENSG00000273976.2  
ENSG00000277505.1  
ENSG00000175676.15  
ENSG00000273981.1  
ENSG00000276941.1  
ENSG00000273756.4  
ENSG00000260399.1  
ENSG00000261739.2  
ENSG00000237850.7  
ENSG00000261497.1  
ENSG00000153684.15  
ENSG00000276891.1  
ENSG00000261524.1  
ENSG00000276928.1  
ENSG00000274532.1  
ENSG00000260159.1  
ENSG00000260053.2  
ENSG00000183629.13  
ENSG00000276955.1  
ENSG00000261041.1  
ENSG00000227717.4  
ENSG00000188626.6



ENSG00000248334.6  
ENSG00000260844.2  
ENSG00000179938.12  
ENSG00000273818.1  
ENSG00000178081.12  
ENSG00000207432.1  
ENSG00000206972.1  
ENSG00000186399.10  
ENSG00000274424.1  
ENSG00000178115.11  
ENSG00000277031.1  
ENSG00000259890.1  
ENSG00000207430.1  
ENSG00000201084.1  
ENSG00000271078.1  
ENSG00000260211.2  
ENSG00000288627.1  
ENSG00000261491.1  
ENSG00000249931.4  
ENSG00000275776.1  
ENSG00000215304.3  
ENSG00000261279.5  
ENSG00000206987.1  
ENSG00000261708.1  
ENSG00000206127.11  
ENSG00000274076.1  
ENSG00000261375.1  
ENSG00000254912.2  
ENSG00000215252.12  
ENSG00000237289.10  
ENSG00000242866.10  
ENSG00000166762.19  
ENSG00000206991.1  
ENSG00000259187.1  
ENSG00000238845.1  
ENSG00000212424.1  
ENSG00000252117.1  
ENSG00000278422.1  
ENSG00000235370.6  
ENSG00000272887.1  
ENSG00000259538.1  
ENSG00000197627.3  
ENSG00000230373.8

ENSG00000259244.1  
ENSG00000189136.9  
ENSG00000277582.1  
ENSG00000188388.10  
ENSG00000183909.6  
ENSG00000275771.1  
ENSG00000248893.3  
ENSG00000261523.1  
ENSG00000254609.1  
ENSG00000270734.1  
ENSG00000263918.1  
ENSG00000265537.1  
ENSG00000207425.1  
ENSG00000183426.17  
ENSG00000275259.1  
ENSG00000270580.5  
ENSG00000277770.1  
ENSG00000103226.19  
ENSG00000263029.1  
ENSG00000257381.3  
ENSG00000265373.2  
ENSG00000244257.5  
ENSG00000183889.12  
ENSG00000278221.1  
ENSG00000277698.1  
ENSG00000276484.1  
ENSG00000285628.1  
ENSG00000205746.9  
ENSG00000257563.1  
ENSG00000266454.1  
ENSG00000185164.15  
ENSG00000274025.1  
ENSG00000277014.1  
ENSG00000157106.17  
ENSG00000183747.12  
ENSG00000260201.2  
ENSG00000260306.1  
ENSG00000271623.1  
ENSG00000205609.13  
ENSG00000275429.1  
ENSG00000278665.1  
ENSG00000196502.12  
ENSG00000181625.17

ENSG00000260280.5  
ENSG00000213648.11  
ENSG00000258150.6  
ENSG00000257506.1  
ENSG00000102879.16  
ENSG00000278887.2  
ENSG00000261444.1  
ENSG00000260847.1  
ENSG00000260649.1  
ENSG00000260540.2  
ENSG00000205456.11  
ENSG00000183632.14  
ENSG00000261391.1  
ENSG00000260864.1  
ENSG00000260845.1  
ENSG00000261108.2  
ENSG00000260644.6  
ENSG00000260414.1  
ENSG00000205457.11  
ENSG00000260781.1  
ENSG00000259842.2  
ENSG00000284209.2  
ENSG00000288300.1  
ENSG00000221725.1  
ENSG00000261816.1  
ENSG00000260923.7  
ENSG00000214946.14  
ENSG00000179277.9  
ENSG00000233090.1  
ENSG00000227790.7  
ENSG00000266302.6  
ENSG00000276088.1  
ENSG00000188933.16  
ENSG00000266129.1  
ENSG00000264892.1  
ENSG00000226145.7  
ENSG00000131885.17  
ENSG00000273018.7  
ENSG00000227689.1  
ENSG00000154874.15  
ENSG00000276532.1  
ENSG00000230197.6  
ENSG00000265746.1

ENSG00000262202.4  
ENSG00000277947.1  
ENSG00000281000.1  
ENSG00000262319.1  
ENSG00000197665.7  
ENSG00000263934.5  
ENSG00000189423.13  
ENSG00000287490.1  
ENSG00000230528.7  
ENSG00000170298.16  
ENSG00000229586.2  
ENSG00000214822.8  
ENSG00000231645.3  
ENSG00000264422.1  
ENSG00000214819.2  
ENSG00000231258.2  
ENSG00000264943.1  
ENSG00000250462.8  
ENSG00000261499.2  
ENSG00000265889.1  
ENSG00000277341.1  
ENSG00000274487.2  
ENSG00000274284.1  
ENSG00000212659.1  
ENSG00000229351.1  
ENSG00000275616.1  
ENSG00000278774.1  
ENSG00000274862.1  
ENSG00000274452.1  
ENSG00000267198.1  
ENSG00000176681.14  
ENSG00000265411.1  
ENSG00000260075.1  
ENSG00000238083.8  
ENSG00000087995.16  
ENSG00000239246.3  
ENSG00000136487.18  
ENSG00000259533.2  
ENSG00000204414.13  
ENSG00000271974.1  
ENSG00000232938.2  
ENSG00000215512.9  
ENSG00000222087.1

ENSG00000267541.1  
ENSG00000282458.1  
ENSG00000176695.8  
ENSG00000281379.2  
ENSG00000178464.6  
ENSG00000267053.8  
ENSG00000243130.8  
ENSG00000204941.14  
ENSG00000243137.8  
ENSG00000183281.15  
ENSG00000271097.1  
ENSG00000273445.1  
ENSG00000225933.1  
ENSG00000234231.4  
ENSG00000253278.1  
ENSG00000241351.3  
ENSG00000253497.1  
ENSG00000253265.1  
ENSG00000240382.3  
ENSG00000254157.1  
ENSG00000253732.1  
ENSG00000211611.2  
ENSG00000253578.1  
ENSG00000253625.1  
ENSG00000241294.1  
ENSG00000244116.3  
ENSG00000253998.3  
ENSG00000243238.1  
ENSG00000253860.1  
ENSG00000253461.1  
ENSG00000253487.1  
ENSG00000253592.1  
ENSG00000242371.1  
ENSG00000283427.1  
ENSG00000283196.2  
ENSG00000251039.3  
ENSG00000250036.1  
ENSG00000239975.3  
ENSG00000253191.1  
ENSG00000253999.1  
ENSG00000211623.2  
ENSG00000254097.1  
ENSG00000211625.2

ENSG00000241244.1  
ENSG00000224041.3  
ENSG00000278857.1  
ENSG00000239819.2  
ENSG00000143429.10  
ENSG00000286156.1  
ENSG00000237383.1  
ENSG00000227265.2  
ENSG00000213355.3  
ENSG00000223564.1  
ENSG00000229089.8  
ENSG00000277701.5  
ENSG00000240069.1  
ENSG00000204588.5  
ENSG00000235721.1  
ENSG00000229730.2  
ENSG00000283283.2  
ENSG00000282785.1  
ENSG00000263881.1  
ENSG00000266139.2  
ENSG00000223973.2  
ENSG00000225744.1  
ENSG00000266063.1  
ENSG00000226516.7  
ENSG00000146556.14  
ENSG00000217950.4  
ENSG00000232742.3  
ENSG00000271153.1  
ENSG00000204556.4  
ENSG00000283443.1  
ENSG00000279493.1  
ENSG00000277117.5  
ENSG00000279687.1  
ENSG00000279094.3  
ENSG00000274333.4  
ENSG00000277777.1  
ENSG00000279186.1  
ENSG00000274559.3  
ENSG00000280013.1  
ENSG00000280179.1  
ENSG00000274790.1  
ENSG00000280019.1  
ENSG00000278903.3

ENSG00000274276.4  
ENSG00000275895.7  
ENSG00000276076.5  
ENSG00000280346.1  
ENSG00000278927.1  
ENSG00000279788.1  
ENSG00000280164.1  
ENSG00000280018.4  
ENSG00000279477.1  
ENSG00000277067.4  
ENSG00000274046.1  
ENSG00000280330.1  
ENSG00000279647.1  
ENSG00000276077.4  
ENSG00000274484.1  
ENSG00000277991.4  
ENSG00000278961.2  
ENSG00000279967.1  
ENSG00000275950.1  
ENSG00000278233.1  
ENSG00000274060.1  
ENSG00000277671.1  
ENSG00000277739.1  
ENSG00000277379.1  
ENSG00000274868.1  
ENSG00000275215.1  
ENSG00000278775.1  
ENSG00000279990.1  
ENSG00000264462.1  
ENSG00000264063.1  
ENSG00000224309.7  
ENSG00000207097.1  
ENSG00000168122.4  
ENSG00000185390.2  
ENSG00000175302.5  
ENSG00000266211.1  
ENSG00000226930.1  
ENSG00000228184.1  
ENSG00000179381.8  
ENSG00000166351.11  
ENSG00000227874.1  
ENSG00000234538.1  
ENSG00000228314.1

ENSG00000178457.3  
ENSG00000205670.12  
ENSG00000222018.2  
ENSG00000180509.13  
ENSG00000221398.1  
ENSG00000142178.9  
ENSG00000185186.10  
ENSG00000214326.2  
ENSG00000160218.13  
ENSG00000241945.8  
ENSG00000160221.18  
ENSG00000237604.1  
ENSG00000276871.1  
ENSG00000276138.1  
ENSG00000184624.4  
ENSG00000236831.1  
ENSG00000130538.6  
ENSG00000235759.1  
ENSG00000215268.3  
ENSG00000213727.3  
ENSG00000230643.1  
ENSG00000230471.1  
ENSG00000231565.1  
ENSG00000226474.1  
ENSG00000224435.2  
ENSG00000198062.15  
ENSG00000225255.6  
ENSG00000235992.1  
ENSG00000232775.6  
ENSG00000275319.1  
ENSG00000277690.2  
ENSG00000278558.5  
ENSG00000274602.5  
ENSG00000274625.1  
ENSG00000275362.1  
ENSG00000286175.1  
ENSG00000273907.1  
ENSG00000182824.7  
ENSG00000197421.10  
ENSG00000234764.2  
ENSG00000169668.11  
ENSG00000239511.2  
ENSG00000224688.1



ENSG00000133475.17  
ENSG00000283145.1  
ENSG00000169662.8  
ENSG00000206142.9  
ENSG00000226534.1  
ENSG00000273846.1  
ENSG00000274600.1  
ENSG00000200057.1  
ENSG00000206140.12  
ENSG00000183506.17  
ENSG00000252143.1  
ENSG00000222352.1  
ENSG00000183246.8  
ENSG00000206090.4  
ENSG00000231271.1  
ENSG00000228039.3  
ENSG00000099984.11  
ENSG00000100280.17  
ENSG00000241278.1  
ENSG00000251178.1  
ENSG00000253540.5  
ENSG00000251669.6  
ENSG00000227551.1  
ENSG00000232399.4  
ENSG00000249482.1  
ENSG00000250231.1  
ENSG00000250844.3  
ENSG00000248920.3  
ENSG00000249811.3  
ENSG00000232264.5  
ENSG00000230430.5  
ENSG00000227140.3  
ENSG00000250566.1  
ENSG00000251101.1  
ENSG00000184139.8  
ENSG00000197465.14  
ENSG00000202215.1  
ENSG00000261914.2  
ENSG00000248308.1  
ENSG00000168967.14  
ENSG00000250138.4  
ENSG00000251158.1  
ENSG00000172058.16

ENSG00000172062.17  
ENSG00000285204.1  
ENSG00000249981.1  
ENSG00000250801.2  
ENSG00000248943.1  
ENSG00000170089.15  
ENSG00000214351.5  
ENSG00000249287.1  
ENSG00000248761.1  
ENSG00000231228.4  
ENSG00000168903.9  
ENSG00000250765.6  
ENSG00000213285.4  
ENSG00000217929.4  
ENSG00000244731.8  
ENSG00000204338.8  
ENSG00000250535.1  
ENSG00000229776.1  
ENSG00000272541.1  
ENSG00000214563.2  
ENSG00000214561.3  
ENSG00000211697.4  
ENSG00000211698.2  
ENSG00000239556.4  
ENSG00000228903.7  
ENSG00000282879.1  
ENSG00000233437.1  
ENSG00000225244.3  
ENSG00000189166.6  
ENSG00000214668.4  
ENSG00000275061.2  
ENSG00000185177.14  
ENSG00000226587.1  
ENSG00000229301.1  
ENSG00000227305.2  
ENSG00000223889.1  
ENSG00000268181.3  
ENSG00000234467.1  
ENSG00000227426.1  
ENSG00000224368.1  
ENSG00000197990.6  
ENSG00000230132.1  
ENSG00000228645.2

ENSG00000265214.1  
ENSG00000273024.6  
ENSG00000230189.7  
ENSG00000236928.3  
ENSG00000233383.1  
ENSG00000174353.17  
ENSG00000229018.5  
ENSG00000201282.1  
ENSG00000273897.1  
ENSG00000273927.1  
ENSG00000123965.13  
ENSG00000239069.1  
ENSG00000276840.1  
ENSG00000267828.1  
ENSG00000273598.1  
ENSG00000202021.1  
ENSG00000278416.1  
ENSG00000199870.1  
ENSG00000205583.13  
ENSG00000275930.1  
ENSG00000233980.1  
ENSG00000250614.1  
ENSG00000231183.4  
ENSG00000241350.1  
ENSG00000201885.1  
ENSG00000233448.2  
ENSG00000201959.1  
ENSG00000078319.10  
ENSG00000201913.1  
ENSG00000170667.15  
ENSG00000105808.18  
ENSG00000205236.6  
ENSG00000267368.1  
ENSG00000222011.9  
ENSG00000213385.3  
ENSG00000237632.3  
ENSG00000229977.2  
ENSG00000271079.1  
ENSG00000252037.1  
ENSG00000170379.21  
ENSG00000241136.1  
ENSG00000198420.10  
ENSG00000225932.3

ENSG00000244198.7  
ENSG00000212807.3  
ENSG00000228960.6  
ENSG00000050327.15  
ENSG00000241449.6  
ENSG00000276538.1  
ENSG00000233363.1  
ENSG00000253896.3  
ENSG00000232039.2  
ENSG00000239839.7  
ENSG00000284620.2  
ENSG00000230045.4  
ENSG00000233132.4  
ENSG00000249005.3  
ENSG00000223885.4  
ENSG00000215373.4  
ENSG00000233295.3  
ENSG00000230549.3  
ENSG00000236125.3  
ENSG00000215371.3  
ENSG00000177257.3  
ENSG00000177243.3  
ENSG00000187082.2  
ENSG00000198129.3  
ENSG00000255251.2  
ENSG00000248944.1  
ENSG00000285975.1  
ENSG00000234749.5  
ENSG00000285687.1  
ENSG00000285814.1  
ENSG00000285913.1  
ENSG00000285620.1  
ENSG00000285937.1  
ENSG00000285720.1  
ENSG00000285657.1  
ENSG00000285607.1  
ENSG00000285950.1  
ENSG00000285862.1  
ENSG00000254776.1  
ENSG00000186562.8  
ENSG00000176782.3  
ENSG00000178287.18  
ENSG00000254543.1

ENSG00000255211.1  
ENSG00000237038.5  
ENSG00000225327.3  
ENSG00000233115.4  
ENSG00000254229.2  
ENSG00000254700.1  
ENSG00000255544.2  
ENSG00000226430.7  
ENSG00000223443.3  
ENSG00000205879.5  
ENSG00000254423.1  
ENSG00000255556.2  
ENSG00000251402.3  
ENSG00000270971.2  
ENSG00000273567.1  
ENSG00000205176.3  
ENSG00000275928.2  
ENSG00000271381.2  
ENSG00000276998.1  
ENSG00000274343.1  
ENSG00000277436.1  
ENSG00000226625.1  
ENSG00000271454.1  
ENSG00000278825.1  
ENSG00000269692.1  
ENSG00000273994.1  
ENSG00000234720.3  
ENSG00000232239.2  
ENSG00000283886.3  
ENSG00000277774.1  
ENSG00000232798.1  
ENSG00000184961.5  
ENSG00000283246.1  
ENSG00000275160.1  
ENSG00000237207.2  
ENSG00000270909.1  
ENSG00000273717.1  
ENSG00000268234.1  
ENSG00000277213.1  
ENSG00000234861.2  
ENSG00000227924.2  
ENSG00000237357.2  
ENSG00000204816.5

ENSG00000224537.1  
ENSG00000213816.3  
ENSG00000276128.2  
ENSG00000238933.1  
ENSG00000273940.1  
ENSG00000229697.2  
ENSG00000231995.2  
ENSG00000275230.1  
ENSG00000227449.8  
ENSG00000224603.1  
ENSG00000204801.7  
ENSG00000236825.2  
ENSG00000241571.2  
ENSG00000219693.3  
ENSG00000170161.7  
ENSG00000288694.1  
ENSG00000235832.2  
ENSG00000277869.1  
ENSG00000236252.2  
ENSG00000276723.1  
ENSG00000275026.1  
ENSG00000276203.5  
ENSG00000284658.1  
ENSG00000276894.1  
ENSG00000273849.1  
ENSG00000276457.1  
ENSG00000274349.5  
ENSG00000277490.1  
ENSG00000274852.1  
ENSG00000276898.1  
ENSG00000274098.1  
ENSG00000277618.1  
ENSG00000232086.1  
ENSG00000189357.9  
ENSG00000278486.1  
ENSG00000265848.1  
ENSG00000159247.13  
ENSG00000278130.1  
ENSG00000268009.6  
ENSG00000231603.1  
ENSG00000231489.1  
ENSG00000274274.1  
ENSG00000237671.3

ENSG00000227488.2  
ENSG00000236362.8  
ENSG00000216649.4  
ENSG00000224902.5  
ENSG00000189064.8  
ENSG00000225397.1  
ENSG00000229826.2  
ENSG00000269502.6  
ENSG00000283594.1  
ENSG00000275520.2  
ENSG00000269405.7  
ENSG00000273746.1  
ENSG00000284800.1  
ENSG00000215029.11  
ENSG00000269226.7  
ENSG00000278646.1  
ENSG00000226929.3  
ENSG00000270493.1  
ENSG00000224089.3  
ENSG00000271154.1  
ENSG00000226600.3  
ENSG00000271041.1  
ENSG00000230347.5  
ENSG00000270397.1  
ENSG00000228517.3  
ENSG00000271502.1  
ENSG00000226023.6  
ENSG00000271211.1  
ENSG00000237957.6  
ENSG00000270736.1  
ENSG00000230594.3  
ENSG00000270771.1  
ENSG00000236126.3  
ENSG00000270646.1  
ENSG00000242362.2  
ENSG00000270456.1  
ENSG00000236371.6  
ENSG00000270251.1  
ENSG00000269096.7  
ENSG00000278289.5  
ENSG00000271449.8  
ENSG00000273696.4  
ENSG00000278085.5

ENSG00000269586.8  
ENSG00000198573.7  
ENSG00000269475.2  
ENSG00000268902.3  
ENSG00000183305.14  
ENSG00000197172.10  
ENSG00000277008.1  
ENSG00000166160.9  
ENSG00000277009.1  
ENSG00000269433.3  
ENSG00000273041.1  
ENSG00000268651.4  
ENSG00000184033.14  
ENSG00000213338.3  
ENSG00000288709.1  
ENSG00000221190.1  
ENSG00000277745.1  
ENSG00000234583.1  
ENSG00000235094.3  
ENSG00000129816.5  
ENSG00000212856.6  
ENSG00000237563.2  
ENSG00000185700.10  
ENSG00000235895.1  
ENSG00000232620.1  
ENSG00000147761.8  
ENSG00000229208.1  
ENSG00000252173.1  
ENSG00000271595.1  
ENSG00000224989.2  
ENSG00000283076.1  
ENSG00000228578.1  
ENSG00000230663.1  
ENSG00000252315.1  
ENSG00000252012.1  
ENSG00000273966.1  
ENSG00000238191.3  
ENSG00000226449.1  
ENSG00000224166.1  
ENSG00000229129.1  
ENSG00000250868.4  
ENSG00000223555.1  
ENSG00000235521.1



ENSG00000252513.1  
ENSG00000224964.1  
ENSG00000225740.1  
ENSG00000237616.1  
ENSG00000226611.2  
ENSG00000236599.1  
ENSG00000229302.1  
ENSG00000251510.1  
ENSG00000238067.1  
ENSG00000230377.1  
ENSG00000169953.12  
ENSG00000236429.1  
ENSG00000176728.10  
ENSG00000249501.1  
ENSG00000248573.1  
ENSG00000238135.1  
ENSG00000224151.1  
ENSG00000251970.1  
ENSG00000238088.1  
ENSG00000242393.1  
ENSG00000242875.6  
ENSG00000234414.7  
ENSG00000228257.1  
ENSG00000242389.8  
ENSG00000227444.1  
ENSG00000237968.1  
ENSG00000231159.1  
ENSG00000232475.1  
ENSG00000236951.5  
ENSG00000131548.7  
ENSG00000169800.14  
ENSG00000229159.1  
ENSG00000228571.1  
ENSG00000230476.1  
ENSG00000224657.9  
ENSG00000224917.1  
ENSG00000230727.1  
ENSG00000228240.1  
ENSG00000276829.1  
ENSG00000215537.3  
ENSG00000226906.1  
ENSG00000244000.1  
ENSG00000232764.1

ENSG00000233126.3  
ENSG00000215540.10  
ENSG00000224169.1  
ENSG00000226873.1  
ENSG00000236620.1  
ENSG00000224866.1  
ENSG00000232424.1  
ENSG00000252681.1  
ENSG00000232910.1  
ENSG00000232845.1  
ENSG00000231540.1  
ENSG00000223362.1  
ENSG00000224571.1  
ENSG00000226369.1  
ENSG00000280961.1  
ENSG00000227871.1  
ENSG00000251917.1  
ENSG00000228465.1  
ENSG00000237467.1  
ENSG00000232205.1  
ENSG00000223698.3  
ENSG00000242854.1  
ENSG00000230977.1  
ENSG00000244231.1  
ENSG00000172342.5  
ENSG00000284071.1  
ENSG00000239533.6  
ENSG00000274234.1  
ENSG00000225491.1  
ENSG00000227439.1  
ENSG00000224210.1  
ENSG00000235412.1  
ENSG00000183795.8  
ENSG00000240566.1  
ENSG00000232976.1  
ENSG00000226270.3  
ENSG00000227837.1  
ENSG00000278602.1  
ENSG00000185894.8  
ENSG00000236379.2  
ENSG00000227633.1  
ENSG00000228786.5  
ENSG00000233944.1

ENSG00000270535.1  
ENSG00000225287.1  
ENSG00000223856.1  
ENSG00000223406.1  
ENSG00000235511.1  
ENSG00000234888.1  
ENSG00000235014.1  
ENSG00000252948.1  
ENSG00000237801.6\_PAR\_Y  
ENSG00000237040.6\_PAR\_Y  
ENSG00000124333.16\_PAR\_Y  
ENSG00000228410.6\_PAR\_Y  
ENSG00000124334.17\_PAR\_Y  
ENSG00000270726.6\_PAR\_Y  
ENSG00000185203.12\_PAR\_Y  
ENSG00000182484.15\_PAR\_Y  
ENSG00000243485.5  
ENSG00000284332.1  
ENSG00000233750.3  
ENSG00000237094.12  
ENSG00000269732.1  
ENSG00000284733.2  
ENSG00000268663.1  
ENSG00000284662.1  
ENSG00000229376.3  
ENSG00000274764.6  
ENSG00000204505.5  
ENSG00000275131.3  
ENSG00000275585.2  
ENSG00000273516.1  
ENSG00000264145.2  
ENSG00000252105.1  
ENSG00000162825.16  
ENSG00000280649.2  
ENSG00000270629.6  
ENSG00000274265.5  
ENSG00000274423.1  
ENSG00000275229.1  
ENSG00000203814.6  
ENSG00000276997.4  
ENSG00000233771.2  
ENSG00000233003.4  
ENSG00000278455.1

ENSG00000276805.2  
ENSG00000228882.1  
ENSG00000233867.2  
ENSG00000227679.1  
ENSG00000228570.8  
ENSG00000274599.2  
ENSG00000276964.1  
ENSG00000275610.1  
ENSG00000278664.1  
ENSG00000278761.1  
ENSG00000278790.1  
ENSG00000276904.1  
ENSG00000278641.1  
ENSG00000253826.1  
ENSG00000270921.1  
ENSG00000230851.1  
ENSG00000255415.1  
ENSG00000256136.1  
ENSG00000177586.6  
ENSG00000270496.1  
ENSG00000257162.6  
ENSG00000255769.7  
ENSG00000257109.3  
ENSG00000259454.1  
ENSG00000183793.14  
ENSG00000277920.1  
ENSG00000214940.8  
ENSG00000277647.1  
ENSG00000276548.1  
ENSG00000185864.17  
ENSG00000277041.1  
ENSG00000198156.10  
ENSG00000255524.8  
ENSG00000278078.1  
ENSG00000169203.16  
ENSG00000205534.6  
ENSG00000198064.13  
ENSG00000260311.1  
ENSG00000282927.1  
ENSG00000277349.1  
ENSG00000275954.5  
ENSG00000273513.1  
ENSG00000274419.6

ENSG00000278299.6  
ENSG00000278599.6  
ENSG00000274611.4  
ENSG00000188755.10  
ENSG00000267792.1  
ENSG00000266971.1  
ENSG00000282059.1  
ENSG00000234837.1  
ENSG00000196862.10  
ENSG00000183054.12  
ENSG00000231943.9  
ENSG00000287165.1  
ENSG00000221055.1  
ENSG00000240356.6  
ENSG00000286267.1  
ENSG00000286032.1  
ENSG00000286148.1  
ENSG00000252199.1  
ENSG00000214319.2  
ENSG00000226444.2  
ENSG00000236097.1  
ENSG00000237299.1  
ENSG00000233408.1  
ENSG00000273643.1  
ENSG00000278008.1  
ENSG00000244699.1  
ENSG00000230304.1  
ENSG00000251155.2  
ENSG00000281720.1  
ENSG00000281058.1  
ENSG00000280799.1  
ENSG00000280757.1  
ENSG00000281627.1  
ENSG00000280457.1  
ENSG00000179978.11  
ENSG00000254701.3  
ENSG00000145736.14  
ENSG00000251634.2  
ENSG00000215630.6  
ENSG00000230178.1  
ENSG00000251035.1  
ENSG00000220212.1  
ENSG00000243307.2

ENSG00000136206.4  
ENSG00000271466.1  
ENSG00000273520.5  
ENSG00000262461.6  
ENSG00000262648.1  
ENSG00000184616.9  
ENSG00000286038.1  
ENSG00000286137.1  
ENSG00000286014.1  
ENSG00000185040.13  
ENSG00000186645.10  
ENSG00000205482.10  
ENSG00000253612.1  
ENSG00000176269.4  
ENSG00000214268.2  
ENSG00000255025.1  
ENSG00000177306.4  
ENSG00000233176.3  
ENSG00000254889.1  
ENSG00000254715.3  
ENSG00000254817.1  
ENSG00000232948.1  
ENSG00000252535.1  
ENSG00000250794.2  
ENSG00000236875.3  
ENSG00000227518.5  
ENSG00000283921.1  
ENSG00000106714.17  
ENSG00000215112.6  
ENSG00000252724.1  
ENSG00000183148.7  
ENSG00000184906.11  
ENSG00000154529.15  
ENSG00000185775.10  
ENSG00000238529.1  
ENSG00000286506.1  
ENSG00000276040.4  
ENSG00000252133.1  
ENSG00000244081.1  
ENSG00000182021.10  
ENSG00000228522.2  
ENSG00000156755.10  
ENSG00000287988.1

ENSG00000204776.6  
ENSG00000275030.1  
ENSG00000277350.2  
ENSG00000274355.1  
ENSG00000274820.1  
ENSG00000278551.1  
ENSG00000286255.1  
ENSG00000168757.12  
ENSG00000234830.8  
ENSG00000233803.9  
ENSG00000225560.6  
ENSG00000258992.7  
ENSG00000238074.5  
ENSG00000230066.6  
ENSG00000270073.1  
ENSG00000223407.1  
ENSG00000172352.5  
ENSG00000229709.1  
ENSG00000225609.1  
ENSG00000227867.1  
ENSG00000234744.1  
ENSG00000223972.5  
ENSG00000279928.2  
ENSG00000278757.1  
ENSG00000223181.1  
ENSG00000207205.1  
ENSG00000207501.1  
ENSG00000206585.1  
ENSG00000212157.1  
ENSG00000212230.1  
ENSG00000222314.1  
ENSG00000264204.2  
ENSG00000279058.2  
ENSG00000204172.12  
ENSG00000222225.1  
ENSG00000212612.1  
ENSG00000258488.2  
ENSG00000261401.1  
ENSG00000200132.1  
ENSG00000222329.1  
ENSG00000259916.1  
ENSG00000207476.1  
ENSG00000283050.2

ENSG00000198237.8  
ENSG00000253366.3  
ENSG00000253900.1  
ENSG00000235558.3  
ENSG00000222533.1  
ENSG00000284728.1  
ENSG00000284698.1  
ENSG00000284603.1  
ENSG00000284663.1  
ENSG00000240240.9  
ENSG00000223839.8  
ENSG00000277737.3  
ENSG00000176115.9  
ENSG00000181997.8  
ENSG00000188120.16  
ENSG00000198312.4  
ENSG00000147996.17



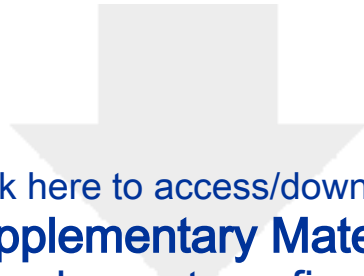

[Click here to access/download](#)

**Supplementary Material**

[KOREF\\_S1v2.1\\_supplementary\\_figures\\_20211210.docx](#)

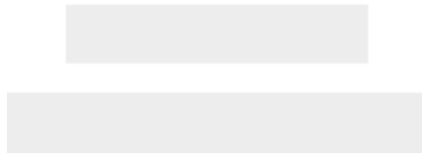

Supplement: giac022_giga-d-21-00219_revision_1.pdf [file giac022_giga-d-21-00219_revision_1.pdf]
